# Supplementary material for: Aromaticity and Extrusion of Benzenoids Linked to [o‐COSAN]−: Clar Has the Answer
Source: PubMed Central journal article supplement — Angew Chem Int Ed Engl. 2022 Mar 29;61(22):e202200672. doi: 10.1002/anie.202200672 (PMC9310775; doi:10.1002/anie.202200672), 2022-03-29
Supplement: ANIE-61-0-s001.pdf [file ANIE-61-0-s001.pdf]

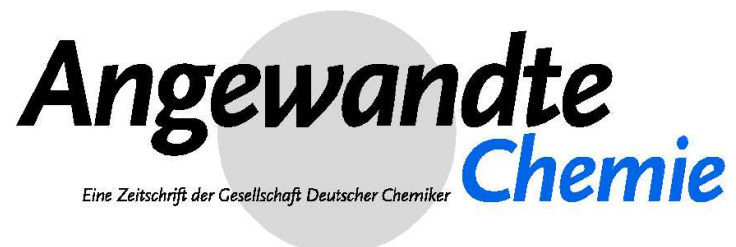

## Supporting Information

### **Aromaticity and Extrusion of Benzenoids Linked to [*o*-COSAN]<sup>-</sup>: Clar Has the Answer**

*J. Poater, C. Viñas, D. Olid, M. Solà\*, F. Teixidor\**

## INDEX

### 1.- General considerations.

Page 4

#### Proposed reaction for the Cobaltabis(dicarbollide) arene coupling.

**Scheme S1:** General pathway for the Electrophilic Induced Nucleophilic Substitution (EINS) reaction, which produces a B-C bond.

**Figure S1.** MALDI-TOF-MS (left) and  $^{11}\text{B}$ -RMN spectra of  $[3,3'\text{-Co}(8\text{-Cl-1,2-C}_2\text{B}_9\text{H}_{10})_2]^-$  (right).

**Scheme S2:** Proposed pathway of the reaction between the anionic  $[3,3'\text{-Co}(1,2\text{-C}_2\text{B}_9\text{H}_{11})_2]^-$  cluster,  $\text{AlCl}_3$  as Lewis acid and pyrene as the nucleophilic substrate in mesitylene.

**Table S1.** The percentage of the different products that can be obtained by the reaction with pyrene with  $[1]^-$  at different temperatures and times. % B-C( $\text{sp}^3$ ) refers to  $\text{CH}_2$  extrusion. % B-C( $\text{sp}^2$ ) refers to non-extrusion. The (–) sign refers to undetected material most probably unreacted  $[1]^-$ . In blue, the optimal conditions found.

**Figure S2.**  $^{11}\text{B}$ -RMN spectra of the reaction of pyrene and  $[1]^-$  at different reaction conditions a) 160 °C, 1 h, b) 80 °C, 1 h and c) 160 °C and 2 h.

### 2.- Representative $^{11}\text{B}$ -NMR spectra of an extruded (anthracene; Figure S3) and non-extruded (pyrene; Figure S4) arene coupling with cobaltabis(dicarbollide).

Page 8

**Figure S3.** a)  $^{11}\text{B}$  NMR and b)  $^{11}\text{B}\{^1\text{H}\}$  NMR spectra of **extruded**  $[8,8'\text{-}\mu\text{-anthracenyl-3,3'}\text{-Co}(1,2\text{-C}_2\text{B}_9\text{H}_{10})_2]^-$  displaying the two characteristic B-C( $\text{sp}^2$ ) and B-C( $\text{sp}^3$ ) resonances that are singlets in the  $^{11}\text{B}$  NMR spectrum when any other resonances are a doublet, and the integration.

**Figure S4.** a)  $^{11}\text{B}$  NMR and b)  $^{11}\text{B}\{^1\text{H}\}$  NMR spectra of **non-extruded**  $[8,8'\text{-}\mu\text{-pyrene-3,3'}\text{-Co}(1,2\text{-C}_2\text{B}_9\text{H}_{10})_2]^-$  displaying the characteristic B-C( $\text{sp}^2$ ) resonance that is a singlet in the  $^{11}\text{B}$  NMR spectrum when any other resonances are a doublet, and the integration.

**Figure S5.**  $^{13}\text{C}\{^1\text{H}\}$  NMR of the **non-extruded**  $[8,8'\text{-}\mu\text{-pyrene-3,3'}\text{-Co}(1,2\text{-C}_2\text{B}_9\text{H}_{10})_2]^-$ .

**Chart 1.** The two possible isomers of **non-extruded**  $[8,8'\text{-}\mu\text{-pyrene-3,3'}\text{-Co}(1,2\text{-C}_2\text{B}_9\text{H}_{10})_2]^-$ . The one in b) has a higher symmetry than the one in a). In b) only one cluster C resonance would be observed, whereas two would be found in a).

### 3.- Synthesis of $[\text{NC}_4\text{H}_{12}][8,8'\text{-}\mu\text{-arenyl-}[3,3'\text{-Co}(\text{C}_2\text{B}_9\text{H}_{10})_2]$ , arene = Naphthalene, Anthracene, Pyrene, and Perylene.

Page 10

#### General considerations.

Page 10

|                              |                |
|------------------------------|----------------|
| <b>General procedure.</b>    | <b>Page 10</b> |
| <b>Data for naphthalene.</b> | <b>Page 11</b> |
| <b>Data for anthracene.</b>  | <b>Page 11</b> |
| <b>Data for pyrene.</b>      | <b>Page 11</b> |
| <b>Data for perylene.</b>    | <b>Page 11</b> |
| <b>Computational Details</b> | <b>Page 13</b> |

**Table S2.** Cartesian coordinates of fused systems between cosan and BENZENOIDs, with and without extrusion.

**Figure S6.** Comparison of aromaticity of linear benzenoids linked and non-linked to [*o*-COSAN]<sup>-</sup>. [*o*-COSAN]<sup>-</sup> without (left) and with extrusion (right). NICS (in ppm) and MCI values (in italics and in au) for the benzenoid moiety are included in the center of the rings, whereas those for the fully relaxed benzenoids not linked to [*o*-COSAN]<sup>-</sup> are depicted outside the rings.

**Figure S7.** Comparison of aromaticity of kinked benzenoids linked and non-linked to [*o*-COSAN]<sup>-</sup>. [*o*-COSAN]<sup>-</sup> without (left) and with extrusion (right). NICS (in ppm) and MCI values (in italics and in au) for the benzenoid moiety are included in the center of the rings, whereas those for the fully relaxed benzenoids not linked to [*o*-COSAN]<sup>-</sup> are depicted outside the rings.

**Table S3:** Extrusion energies (in kcal mol<sup>-1</sup>) computed based on two different reactions: (1) [*o*-COSAN]<sup>-</sup>-benzenoid + H<sub>2</sub> → [*o*-COSAN]<sup>-</sup>-benzenoid<sup>extruded</sup>; and (2) [*o*-COSAN]<sup>-</sup> + benzenoid → [*o*-COSAN]<sup>-</sup>-benzenoid<sup>extruded</sup> + H<sub>2</sub>. Distances (in Å) between the two B atoms fused to the benzenoid are also included.

**Figure S8.** Comparison of aromaticity of linear and kinked benzenoids linked and non-linked to [*o*-COSAN]<sup>-</sup> without extrusion. NICS (in ppm) and MCI values (in italics and in au) for the benzenoid moiety are included in the center of the rings, whereas those for the fully relaxed benzenoids not linked to [*o*-COSAN]<sup>-</sup> are depicted outside the rings, at the same B3LYP/6-311++G\*\* level of theory (in black) and at the CAM-B3LYP/6-311++G\*\* (in blue).

|                    |                |
|--------------------|----------------|
| <b>References.</b> | <b>Page 32</b> |
|--------------------|----------------|

## 1.- General considerations:

The following reactions have been inspired in the Friedel-Craft reaction although no halogenated reagents, the typical R-Cl or RC(O)Cl leading to alkylation or acylation have not been used. In our case only B-H from  $[3,3'\text{-Co}(1,2\text{-C}_2\text{B}_9\text{H}_{11})_2]^-$ ,  $[1]^-$  and double bonds from arenes have been the reacting sites used in mesitylene. Thus, these reactions have in common with the Friedel-Craft reaction the anhydrous  $\text{AlCl}_3$ .

### Proposed reaction for the Cobaltabis(dicarbollide) arene coupling.

In a first step (Scheme S1), the Lewis acid removes the hydride of the B(8) vertex, the most electrophilic boron of the anionic  $[3,3'\text{-Co}(1,2\text{-C}_2\text{B}_9\text{H}_{11})_2]^-$  cluster, and in a second step the nucleophilic attack by the aromatic substrate takes place.

**Scheme S1:** General pathway for the Electrophilic Induced Nucleophilic Substitution (EINS) reaction, which produces a B-C bond.

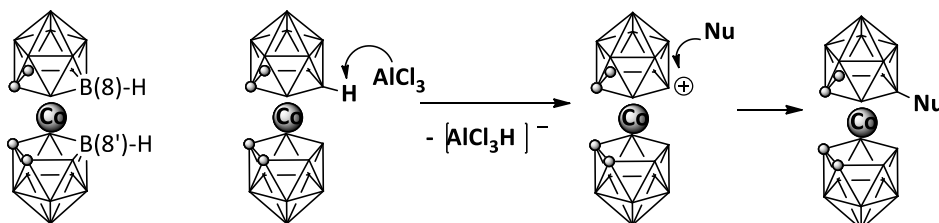

Unless otherwise noted, all manipulations were carried out under a dinitrogen atmosphere using standard vacuum line techniques. Dried anhydrous  $\text{AlCl}_3$  was used as a catalyst, and the reactions were conducted in dried mesitylene. Minor amounts of water or just a bit of hydrated  $\text{AlCl}_3$  or a slow T increase led to chlorinated  $[3,3'\text{-Co}(1,2\text{-C}_2\text{B}_9\text{H}_{11})_2]^-$ , which were unwanted byproducts, as confirmed by  $^{11}\text{B}$ -NMR (the resonances of B-Cl vertices are found at downfield in the region near +15 ppm) and MALDI-TOF-MS spectra (Figure S1).

**Figure S1.** MALDI-TOF-MS (left) and  $^{11}\text{B}$ -RMN spectra of  $[3,3'\text{-Co}(8\text{-Cl-1,2-}\text{C}_2\text{B}_9\text{H}_{10})_2]^-$  (right).

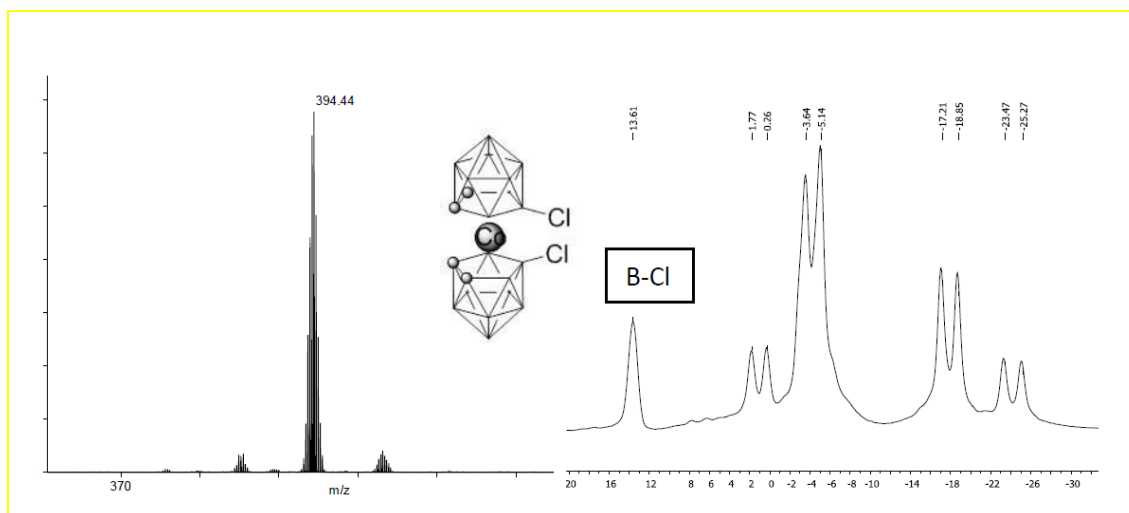

In a second step (Scheme S2), after the substitution at the B(8) vertex, the B(8') of the second cluster's moiety is also able to react, and further reaction on this B(8') vertex can go on as displayed in Scheme S2 in the case of arene = pyrene.

**Scheme S2:** Proposed pathway of the reaction between the anionic  $[3,3'\text{-Co}(1,2\text{-}\text{C}_2\text{B}_9\text{H}_{11})_2]^-$  cluster,  $\text{AlCl}_3$  as Lewis acid and pyrene as the nucleophilic substrate in mesitylene.

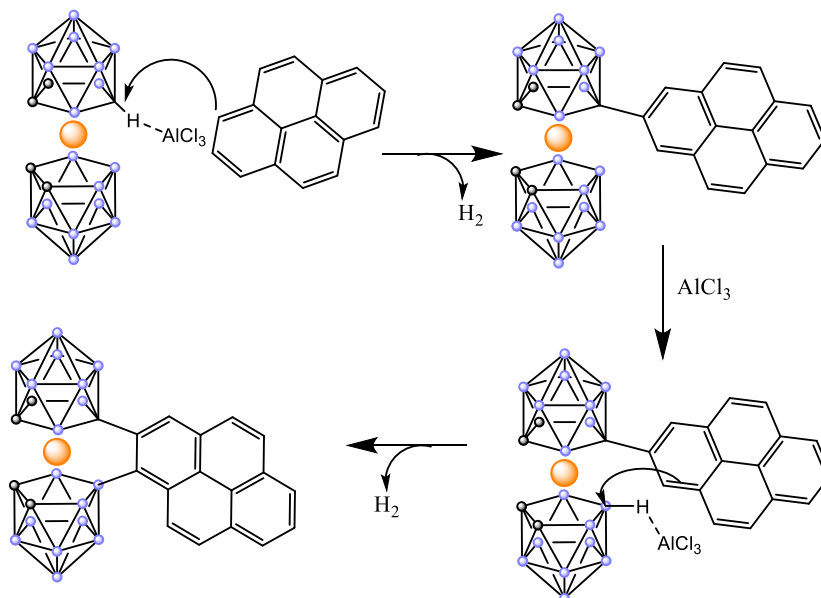

The solvent for these coupling reactions between cobaltabis(dicarbollide) and arenes must follow some requirements, which are: i) it does not react as a reagent, ii) it must have a high boiling point, and iii) it must be a good solvent for the reagents. Mesitylene (1,3,5-trimethylbenzene) with a molecular formula  $C_9H_{12}$ , melting and boiling points  $-44.8$  and  $164.7$  °C, respectively, was considered to be the best option as a solvent for running the coupling reactions.

When studying the best conditions several Lewis acids, temperature and time of the reaction were tested. Lewis acids:  $FeCl_3$ ,  $AlCl_3$ ,  $BF_3 \cdot Et_2O$  and  $Sm(OTf)_3$  were tested, however, the best results were obtained with  $AlCl_3$ . The reaction was run at different temperatures but the best yields were achieved at  $160$  °C (see Table S1). Reaction times studied were in the range 1 - 5h (see Table S1).

**Table S1.** The percentage of the different products that can be obtained by the reaction with pyrene with  $[1]^-$  at different temperatures and times. % B-C( $sp^3$ ) refers to  $CH_2$  extrusion. % B-C( $sp^2$ ) refers to non-extrusion. The (–) sign refers to undetected material most probably unreacted  $[1]^-$ . In blue, the optimal conditions found.

| Time (hours) | T (°C)     | % B-Cl   | % B-C( $sp^3$ ) | % B-C( $sp^2$ ) |
|--------------|------------|----------|-----------------|-----------------|
| 1            | r.t.       | 80       | -               | -               |
| 1            | 80         | 75       | -               | 5               |
| 1            | 160        | -        | -               | 70              |
| 2            | r.t.       | 100      | 0               | 0               |
| 2            | 80         | 60       | 0               | 40              |
| <b>2</b>     | <b>160</b> | <b>0</b> | <b>0</b>        | <b>100</b>      |
| 5            | r-t-       | 100      | 0               | 0               |
| 5            | 80         | 60       | 20              | 20              |
| 5            | 160        | 0        | 90              | 10              |

From Table S1, it is quite clear that for pyrene high temperature and relatively short reactions times (2h) leads to the non-extruded compounds. Extended reaction times leads to the extruded species. This, as is discussed in the paper, depends on the possibility to preserve the Clar's sextets. Figure S2 shows the influence of T and time on the evolution of the reaction. The  $\text{AlCl}_3$  at low T becomes an undesirable chlorinating agent leading to the di-chlorinated  $[\mathbf{1}]^-$  cluster at the B(8) and B(8') vertices, as observed by  $^{11}\text{B}$ -NMR spectrum (Figure S1-c) and supported by MALDI-TOF-MS spectrum (Figure S2 left).

**Figure S2.**  $^{11}\text{B}$ -RMN spectra of the reaction of pyrene and  $[\mathbf{1}]^-$  at different reaction conditions a) 160 °C, 1 h, b) 80 °C, 1 h and c) 160 °C and 2 h.

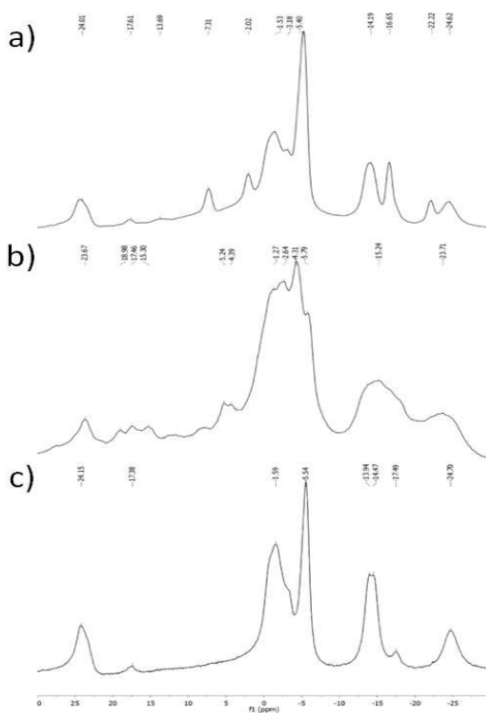

**2.- Representative  $^{11}\text{B}$ -NMR spectra of an extruded (anthracene; Figure S3) and non-extruded (pyrene; Figure S4) arene coupling with cobaltabis(dicarbollide).**

**Figure S3.** a)  $^{11}\text{B}$  NMR and b)  $^{11}\text{B}\{^1\text{H}\}$  NMR spectra of **extruded**  $[8,8^{\mu}\text{-anthracenyl-3,3'}\text{-Co}(1,2\text{-C}_2\text{B}_9\text{H}_{10})_2]^-$  displaying the two characteristic B-C(sp<sup>2</sup>) and B-C(sp<sup>3</sup>) resonances that are singlets in the  $^{11}\text{B}$  NMR spectrum when any other resonances are a doublet, and the integration.

a)

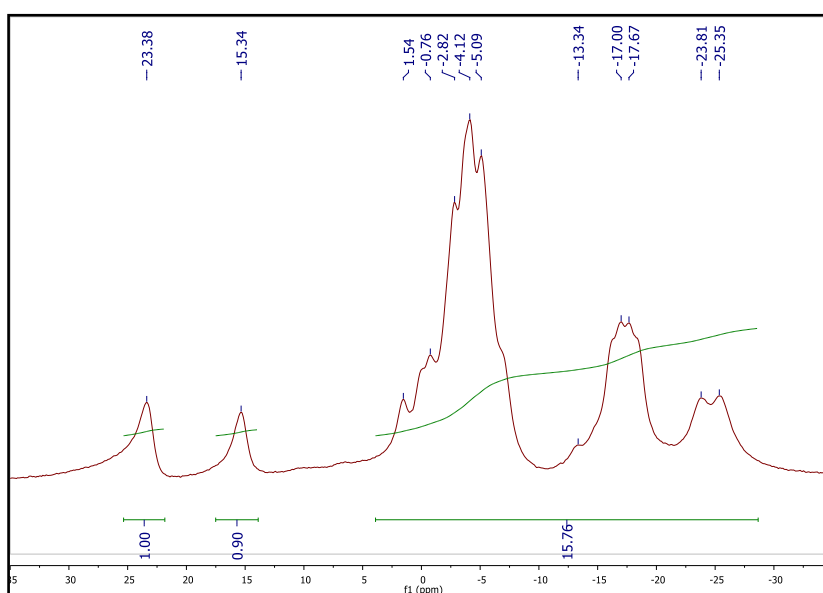

b)

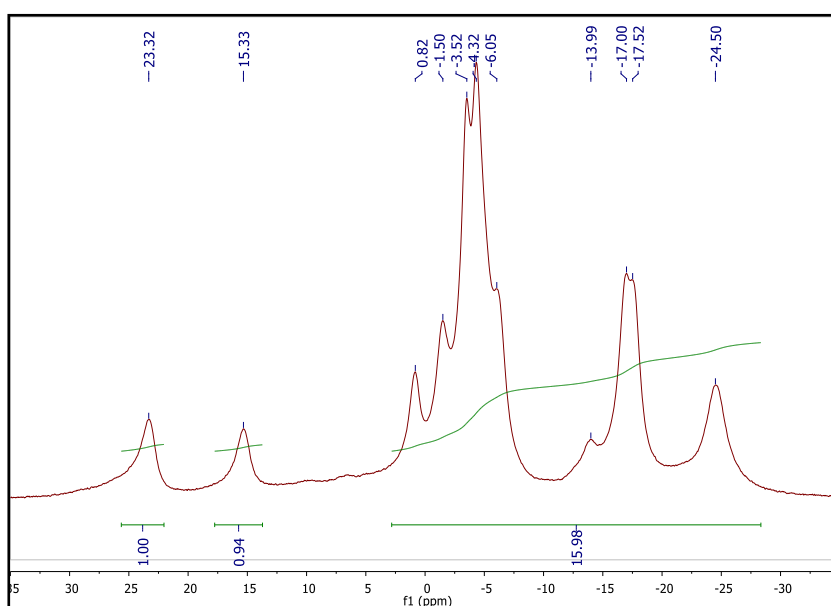



**Figure S4.** a)  $^{11}\text{B}$  NMR and b)  $^{11}\text{B}\{^1\text{H}\}$  NMR spectra of **non-extruded** [8,8'- $\mu$ -pyrene-3,3'-Co(1,2-C<sub>2</sub>B<sub>9</sub>H<sub>10</sub>)<sub>2</sub>]<sup>-</sup> displaying the characteristic B-C(sp<sup>2</sup>) resonance that is a singlet in the  $^{11}\text{B}$  NMR spectrum when any other resonances are a doublet, and the integration.

a)

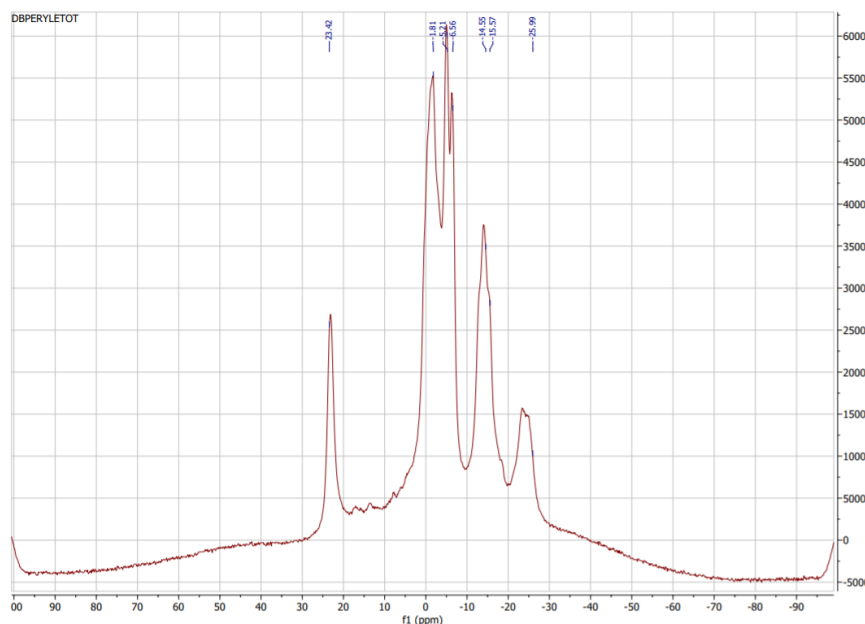

b)

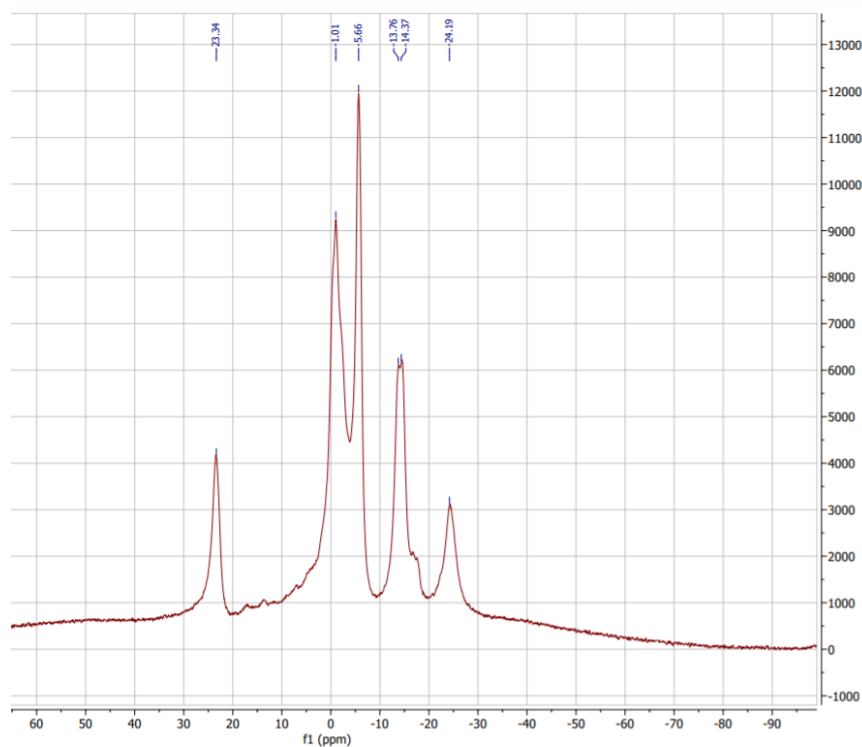

Figure S5 displays the  $^{13}\text{C}\{^1\text{H}\}$  NMR of the **non-extruded**  $[8,8'\text{-}\mu\text{-pyrene-3,3'}\text{-Co}(1,2\text{-C}_2\text{B}_9\text{H}_{10})_2]^-$ . The spectrum shows two different C<sub>c</sub>-H resonances at 46.3 and 45.2 ppm, different from the ones of the parent starting Cs $[3,3'\text{-Co}(1,2\text{-C}_2\text{B}_9\text{H}_{11})_2]$  cluster. These indicate that the two halves, the upper and the lower, are not equivalent proving that the pyrene is not symmetrically distributed, ruling out a fully symmetric pyrene as would be the structure in Chart 1 right.

**Figure S5.**  $^{13}\text{C}\{^1\text{H}\}$  NMR of the **non-extruded**  $[8,8'\text{-}\mu\text{-pyrene-3,3'}\text{-Co}(1,2\text{-C}_2\text{B}_9\text{H}_{10})_2]^-$ .

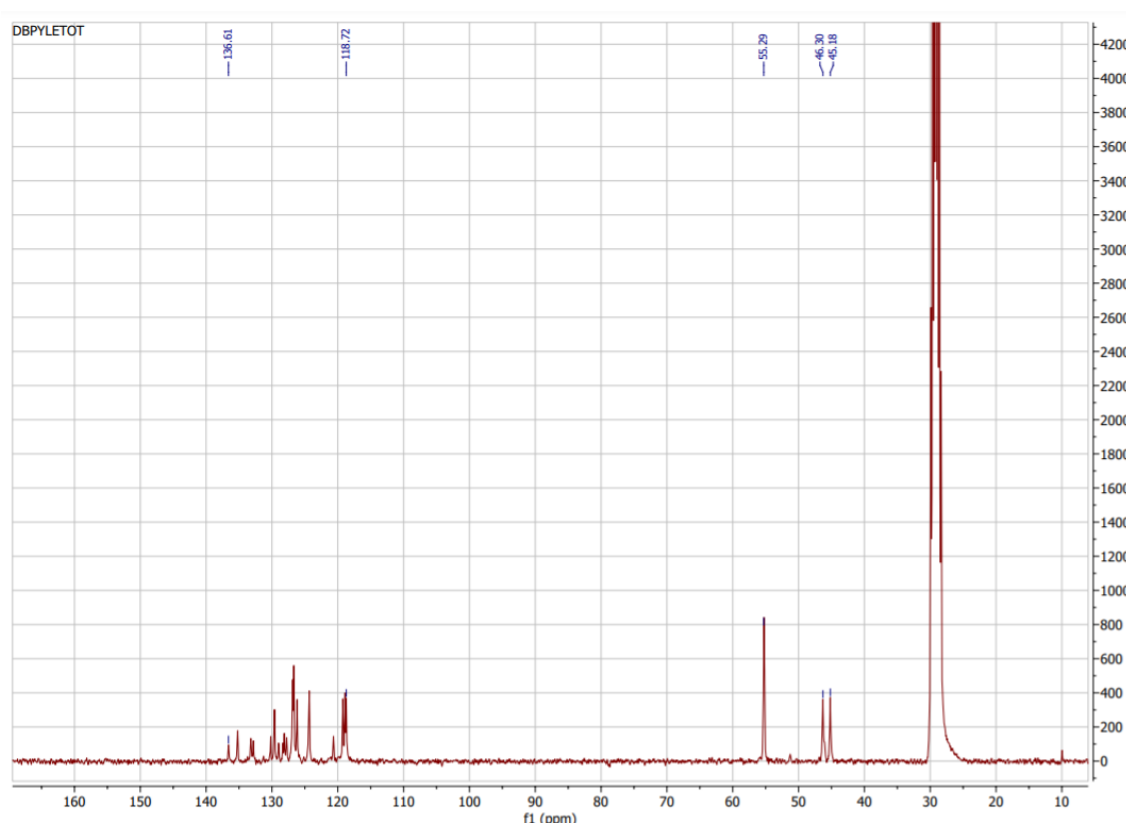

**Chart 1.** The two possible isomers of **non-extruded**  $[8,8'\text{-}\mu\text{-pyrene-3,3'}\text{-Co}(1,2\text{-C}_2\text{B}_9\text{H}_{10})_2]^-$ . The one in b) has a higher symmetry than the one in a). In b) only one cluster C resonance would be observed, whereas two would be found in a).

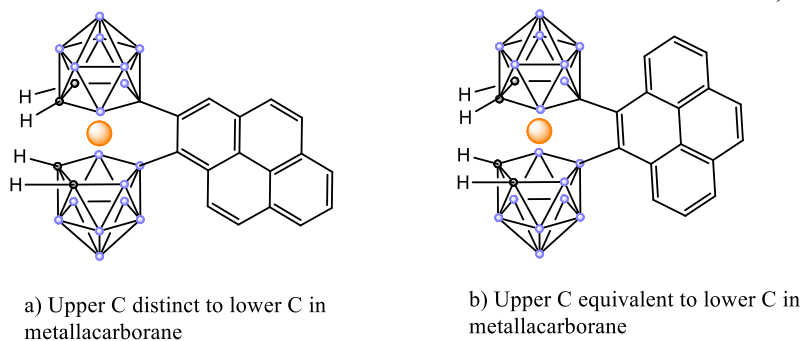

As the  $^{13}\text{C}\{^1\text{H}\}$  NMR shows two  $^{13}\text{C}$  resonances in the 46.3 and 45.2 ppm region, the  $^{13}\text{C}$ -NMR proves that the **non-extruded**  $[8,8'\text{-}\mu\text{-pyrene-3,3'}\text{-Co(1,2-C}_2\text{B}_9\text{H}_{10})_2]^-$  is the one represented by a) at the Chart 1. The MALDI-TOF-MS spectrum shows a single peak with the corresponding isotopic distribution centered at 522 m/e.

### **3.- Synthesis of $[\text{NC}_4\text{H}_{12}][8,8'\text{-}\mu\text{-arenyl-}[3,3'\text{-Co(C}_2\text{B}_9\text{H}_{10})_2]$ , arene = Naphthalene, Anthracene, Pyrene, and Perylene.**

**General considerations:** To run the NMR spectra it was attempted that the concentration of the complexes was near to  $1 \times 10^{-3} \text{ mol L}^{-1}$ .  $^1\text{H}$  and  $^1\text{H}\{^{11}\text{B}\}$  NMR (300.13 MHz),  $^{13}\text{C}\{^1\text{H}\}$  NMR (75.47 MHz), and  $^{11}\text{B}$  and  $^{11}\text{B}\{^1\text{H}\}$  NMR (96.29 MHz) spectra were recorded with a Bruker ARX 300 instrument equipped with the appropriate decoupling accessories. Chemical shift values for  $^{11}\text{B}$  and  $^{11}\text{B}\{^1\text{H}\}$  NMR spectra are referenced to external  $\text{BF}_3 \cdot \text{OEt}_2$ , and those for  $^1\text{H}$ ,  $^1\text{H}\{^{11}\text{B}\}$ , and  $^{13}\text{C}\{^1\text{H}\}$  NMR spectra are referenced to  $\text{SiMe}_4$ . Chemical shifts are reported in units of parts per million downfield from the reference signal, and all coupling constants are reported in Hertz. . The mass spectra were recorded in the negative ion mode using a Bruker Biflex MALDI-TOF-MS [ $\text{N}_2$  laser;  $\lambda_{\text{exc}}$  337 nm (0.5 ns pulses); voltage ion source 20.00 kV (Uis1) and 17.50 kV (Uis2)]. MALDI-TOF-MS spectra were run using  $\text{Cs}[3,3'\text{-Co(1,2-C}_2\text{B}_9\text{H}_{11})_2]$ , [**1**] $^-$ , as the reference with the base peak of the molecular ion set at 324 m/e. Unless otherwise noted, all manipulations were carried out under a dinitrogen atmosphere using standard vacuum line techniques. Dried anhydrous  $\text{AlCl}_3$  was used as a catalyst, and the reactions were conducted in dried mesitylene. The cesium salt of compound [**1**] $^-$  was supplied by Katchem Ltd. (Prague) and was used as received. All other reagents were obtained commercially and were used as purchased.

**General procedure:** The  $\text{Cs}[\mathbf{1}]$  (50 mg, 0.11 mmol) was set for 3 hours at vacuum at  $80^\circ\text{C}$  to remove any residual moisture. The corresponding dried arene (0.22-0.27 mmol)

and 8.8 mg dried anhydrous  $\text{AlCl}_3$  were added. Then, 3mL of dried mesitylene were added as a solvent. The mixture was immersed in an oil bath (160 °C) for 2 h. Mesitylene was evaporated under vacuum and the residue was extracted three times with  $\text{Et}_2\text{O}:\text{HCl}_{\text{aq}}$  (0.1M) in a ratio of 5:10 mL. The organic layer was dried over  $\text{MgSO}_4$ , filtered, and evaporated under vacuum. The residue was dissolved in the minimum volume of EtOH and an aqueous solution containing an excess of  $[\text{NMe}_4]\text{Cl}$  was added, resulting in the formation of an orange precipitate. This was filtered off, washed and dried in vacuum.

**Data for naphthalene:**  $[\text{NC}_4\text{H}_{12}][8,8'\text{-}\mu\text{-C}_{10}\text{H}_8\text{-Co}(\text{C}_2\text{B}_9\text{H}_{10})_2]$ : Yield: 46 mg (80%).

The spectral data is consistent with those reported earlier in cyclohexane.<sup>[1]</sup>

**Data for anthracene:**  $[\text{NC}_4\text{H}_{12}][8,8'\text{-}\mu\text{-C}_{14}\text{H}_{10}\text{-Co}(\text{C}_2\text{B}_9\text{H}_{10})_2]$ . Yield: 49 mg (77%).

$^{11}\text{B}$ -NMR:  $\delta = 23.4$  (s, 1B), 15.3 (s, 1B), 1.01 (d,  $^1\text{J}(\text{B},\text{H}) = 130$  Hz, 1B), -0.2 (d,  $^1\text{J}(\text{B},\text{H}) = 130$  Hz, 1B), -3.8 (d,  $^1\text{J}(\text{B},\text{H}) = 130$  Hz, 4B), -4.6 (d,  $^1\text{J}(\text{B},\text{H}) = 130$  Hz, 4B), -16.3 (d,  $^1\text{J}(\text{B},\text{H}) = 140$  Hz, 2B), -18.3 (d,  $^1\text{J}(\text{B},\text{H}) = 140$  Hz, 2B), -24.6 (d,  $^1\text{J}(\text{B},\text{H}) = 150$  Hz, 2B).  $^1\text{H}$ -NMR: 7.80-7.30 (m, 6H,  $\text{H}_{\text{aryl}}$ ), 3.86 (s, 2H,  $\text{C}_c\text{-H}$ ), 3.83 (s, 2H,  $\text{C}_c\text{-H}$ ), 3.45 (s, 12H,  $\text{N}(\text{CH}_3)_4$ ), 2.16 (s, 2H,  $\text{CH}_2$ ), and 2.06 (s, 2H,  $\text{CH}_2$ ). MALDI-TOF-MS 500 m/e.

**Data for pyrene:**  $[\text{NC}_4\text{H}_{12}][8,8'\text{-}\mu\text{-C}_{16}\text{H}_8\text{-Co}(\text{C}_2\text{B}_9\text{H}_{10})_2]$ . Yield: 49 mg (75%).

$^{13}\text{C}\{^1\text{H}\}$ -NMR:  $\delta = 136.6$ -118.7 ( $\text{C}_{16}\text{H}_8$ ), 55.3 ( $\text{N}(\text{CH}_3)_4$ ), 46.3 ( $\text{C}_c\text{-H}$ ), 45.2 ( $\text{C}_c\text{-H}$ ).  $^{11}\text{B}$ -NMR:  $\delta = 23.3$  (s, 2B), -1.01 (d,  $^1\text{J}(\text{B},\text{H}) = 130$  Hz, 6B), -5.66 (d,  $^1\text{J}(\text{B},\text{H}) = 130$  Hz, 4B), -13.76 (d,  $^1\text{J}(\text{B},\text{H}) = 126$  Hz, 2B), -14.37 (d,  $^1\text{J}(\text{B},\text{H}) = 145$  Hz, 2B), -24.19 (d,  $^1\text{J}(\text{B},\text{H}) = 120$  Hz, 2B). MALDI-TOF-MS 522 m/e.

**Data for perylene:**  $[\text{NC}_4\text{H}_{12}][8,8'\text{-}\mu\text{-C}_{20}\text{H}_{10}\text{-Co}(\text{C}_2\text{B}_9\text{H}_{10})_2]$ . Yield: 49 mg (69%).

$^1\text{H}\{^{11}\text{B}\}$ -NMR:  $\delta = 8.72$ -7.37 (10H,  $\text{C}_{20}\text{H}_{10}$ ), 3.90 (2H,  $\text{C}_c\text{-H}$ ), 3.83 (2H,  $\text{C}_c\text{-H}$ ), 3.45 (12H,  $\text{N}(\text{CH}_3)_4$ ), 3.20-1.61 (br.s, B-H)  $^{13}\text{C}\{^1\text{H}\}$ -NMR:  $\delta = 136.57$ -118.68 ( $\text{C}_{20}\text{H}_{12}$ ),

55.25 (N(CH<sub>3</sub>)<sub>4</sub>), 46.26 (C<sub>c</sub>-H), 45.14 (C<sub>c</sub>-H). <sup>11</sup>B-NMR: δ = 23.27 (s, 2B), -1.05 (d, <sup>1</sup>J(B,H) = 134 Hz, 6B), -5.75 (d, <sup>1</sup>J(B,H) = 142 Hz, 4B), -14.09 (d, <sup>1</sup>J(B,H) = 145 Hz, 2B), -14.40 (d, <sup>1</sup>J(B,H) = 151 Hz, 2B), -24.25 (d, <sup>1</sup>J(B,H) = 139 Hz, 2B). MALDI-TOF-MS 572 m/e.

### Computational Details

Computational analysis: All calculations were performed with the Gaussian 09 package<sup>[2]</sup> by means of the B3LYP<sup>[3,4,5]</sup> hybrid density functional, with dispersion correction with Becke-Johnson damping, and the 6-311++G(d,p) basis set.<sup>[6]</sup> The geometry optimizations were carried out without symmetry constraints. Analytical Hessians were computed to characterize the optimized structures as minima (zero imaginary frequencies). Aromaticity was evaluated by means of the nucleus-independent chemical shift (NICS),<sup>[7,8,9,10]</sup> proposed by Schleyer and co-workers as a magnetic descriptor of aromaticity. NICS is defined as the negative value of the absolute shielding computed at a ring center or at some other point of the system. Rings with large negative NICS values are considered aromatic. NICS values were computed using the gauge-including atomic orbital method (GIAO).<sup>[11]</sup> Aromaticity of rings of benzenoids was further evaluated with the multicenter index (MCI),<sup>[12,13,14]</sup> which measures the electron sharing in the ring, and computed by means of ESI-3D software.<sup>[15,16,17,18]</sup> Thermodynamic data has also been computed at the BLYP-D3BJ/TZ2P//B3LYP(GD3BJ)/6-311++G\*\* level by means of AMS software.<sup>[19,18]</sup>

**Table S2.** Cartesian coordinates of fused systems between cosan and BENZENOIDs, with and without extrusion.

| Benzene |   |   |          |           |           |
|---------|---|---|----------|-----------|-----------|
| 1       | 5 | 0 | 3.052126 | -2.299672 | -0.000064 |
| 2       | 1 | 0 | 3.416424 | -3.422828 | -0.000178 |
| 3       | 5 | 0 | 3.938134 | -0.777253 | -0.000176 |
| 4       | 1 | 0 | 5.122971 | -0.783894 | -0.000393 |
| 5       | 5 | 0 | 3.006677 | -1.271207 | 1.421182  |
| 6       | 1 | 0 | 3.425759 | -1.692423 | 2.443763  |
| 7       | 5 | 0 | 1.468281 | -0.358821 | 1.437402  |
| 8       | 1 | 0 | 1.063631 | -0.183362 | 2.527224  |
| 9       | 5 | 0 | 3.006465 | -1.271259 | -1.421141 |
| 10      | 1 | 0 | 3.425058 | -1.692915 | -2.443754 |
| 11      | 5 | 0 | 1.468429 | -0.358615 | -1.437379 |
| 12      | 1 | 0 | 1.064255 | -0.183078 | -2.527380 |
| 13      | 5 | 0 | 2.961036 | 0.417982  | -0.886847 |
| 14      | 1 | 0 | 3.467135 | 1.272645  | -1.533959 |
| 15      | 5 | 0 | 2.960962 | 0.418128  | 0.886708  |

|    |    |   |           |           |           |
|----|----|---|-----------|-----------|-----------|
| 16 | 1  | 0 | 3.466691  | 1.273063  | 1.533743  |
| 17 | 5  | 0 | 1.425579  | 0.730750  | -0.000036 |
| 18 | 1  | 0 | -1.064530 | -0.182765 | 2.527364  |
| 19 | 5  | 0 | -1.468628 | -0.358377 | 1.437328  |
| 20 | 5  | 0 | -3.006650 | -1.271004 | 1.421071  |
| 21 | 5  | 0 | -2.961153 | 0.418169  | 0.886555  |
| 22 | 5  | 0 | -1.425599 | 0.730820  | -0.000121 |
| 23 | 1  | 0 | -3.425371 | -1.692466 | 2.443711  |
| 24 | 5  | 0 | -3.052240 | -2.299651 | 0.000137  |
| 25 | 5  | 0 | -3.938148 | -0.777147 | -0.000051 |
| 26 | 1  | 0 | -3.467316 | 1.272898  | 1.533530  |
| 27 | 5  | 0 | -2.960853 | 0.418098  | -0.886963 |
| 28 | 5  | 0 | -1.468079 | -0.358885 | -1.437391 |
| 29 | 1  | 0 | -3.416548 | -3.422801 | 0.000302  |
| 30 | 5  | 0 | -3.006487 | -1.271317 | -1.421217 |
| 31 | 1  | 0 | -5.122986 | -0.783697 | -0.000028 |
| 32 | 1  | 0 | -3.466528 | 1.272944  | -1.534160 |
| 33 | 1  | 0 | -1.063461 | -0.183759 | -2.527264 |
| 34 | 1  | 0 | -3.425477 | -1.692551 | -2.443828 |
| 35 | 27 | 0 | -0.000019 | -0.838938 | 0.000132  |
| 36 | 6  | 0 | -1.570449 | -1.922411 | 0.799773  |
| 37 | 6  | 0 | -1.570354 | -1.922601 | -0.799552 |
| 38 | 6  | 0 | 1.570401  | -1.922507 | 0.799776  |
| 39 | 6  | 0 | 1.570282  | -1.922498 | -0.799619 |
| 40 | 1  | 0 | 1.170324  | -2.792837 | 1.300402  |
| 41 | 1  | 0 | 1.170052  | -2.792784 | -1.300179 |
| 42 | 1  | 0 | -1.170237 | -2.792587 | 1.300538  |
| 43 | 1  | 0 | -1.170154 | -2.792956 | -1.300031 |
| 44 | 6  | 0 | 1.389457  | 3.356877  | 0.000261  |
| 45 | 6  | 0 | 0.696992  | 4.568509  | 0.000206  |
| 46 | 6  | 0 | 0.706236  | 2.137000  | 0.000092  |
| 47 | 6  | 0 | -0.696823 | 4.568546  | -0.000148 |
| 48 | 6  | 0 | -0.706189 | 2.137037  | -0.000186 |
| 49 | 6  | 0 | -1.389349 | 3.356948  | -0.000285 |
| 50 | 1  | 0 | -2.474851 | 3.359604  | -0.000513 |
| 51 | 1  | 0 | 2.474960  | 3.359481  | 0.000500  |
| 52 | 1  | 0 | 1.242076  | 5.507619  | 0.000371  |
| 53 | 1  | 0 | -1.241858 | 5.507683  | -0.000247 |

Benzene-extrusion

|    |   |   |           |           |           |
|----|---|---|-----------|-----------|-----------|
| 1  | 5 | 0 | 1.938520  | -3.151754 | 0.202723  |
| 2  | 1 | 0 | 1.852245  | -4.325307 | 0.299322  |
| 3  | 5 | 0 | 3.337069  | -2.082415 | 0.117186  |
| 4  | 1 | 0 | 4.432980  | -2.531233 | 0.157501  |
| 5  | 5 | 0 | 2.284752  | -2.064328 | 1.541928  |
| 6  | 1 | 0 | 2.515328  | -2.529376 | 2.604497  |
| 7  | 5 | 0 | 1.202448  | -0.639034 | 1.431924  |
| 8  | 1 | 0 | 0.864293  | -0.215620 | 2.478672  |
| 9  | 5 | 0 | 2.293668  | -2.302579 | -1.297349 |
| 10 | 1 | 0 | 2.525325  | -2.941823 | -2.265423 |
| 11 | 5 | 0 | 1.210293  | -0.881574 | -1.427917 |
| 12 | 1 | 0 | 0.846528  | -0.645634 | -2.527885 |
| 13 | 5 | 0 | 2.884736  | -0.687748 | -0.897457 |
| 14 | 1 | 0 | 3.687648  | -0.148478 | -1.583296 |
| 15 | 5 | 0 | 2.884250  | -0.540817 | 0.876924  |
| 16 | 1 | 0 | 3.679850  | 0.111977  | 1.465394  |
| 17 | 5 | 0 | 1.587857  | 0.267505  | -0.080647 |
| 18 | 1 | 0 | -1.559825 | -0.865969 | 2.477156  |
| 19 | 5 | 0 | -1.852683 | -0.431466 | 1.416538  |
| 20 | 5 | 0 | -3.536037 | -0.782963 | 0.914381  |

|    |    |   |           |           |           |
|----|----|---|-----------|-----------|-----------|
| 21 | 5  | 0 | -3.012921 | 0.879537  | 1.194882  |
| 22 | 5  | 0 | -1.316178 | 1.102931  | 0.629681  |
| 23 | 1  | 0 | -4.218716 | -1.460326 | 1.603490  |
| 24 | 5  | 0 | -3.559550 | -1.070127 | -0.821746 |
| 25 | 5  | 0 | -4.063629 | 0.495763  | -0.193163 |
| 26 | 1  | 0 | -3.419691 | 1.503948  | 2.118523  |
| 27 | 5  | 0 | -2.699520 | 1.619117  | -0.396072 |
| 28 | 5  | 0 | -1.342804 | 0.764426  | -1.144969 |
| 29 | 1  | 0 | -4.163265 | -1.940320 | -1.343749 |
| 30 | 5  | 0 | -3.032665 | 0.399621  | -1.631078 |
| 31 | 1  | 0 | -5.198792 | 0.828449  | -0.262844 |
| 32 | 1  | 0 | -2.878994 | 2.772332  | -0.607223 |
| 33 | 1  | 0 | -0.690320 | 1.246579  | -1.998958 |
| 34 | 1  | 0 | -3.358548 | 0.576018  | -2.754043 |
| 35 | 27 | 0 | -0.325373 | -0.681442 | -0.008298 |
| 36 | 6  | 0 | -2.205420 | -1.489020 | 0.145093  |
| 37 | 6  | 0 | -1.919356 | -0.819218 | -1.290108 |
| 38 | 6  | 0 | 0.715728  | -2.177750 | 0.929339  |
| 39 | 6  | 0 | 0.724541  | -2.317550 | -0.674769 |
| 40 | 1  | 0 | 0.006947  | -2.778172 | 1.480921  |
| 41 | 1  | 0 | 0.019331  | -3.007606 | -1.117364 |
| 42 | 1  | 0 | -2.099262 | -2.562654 | 0.221469  |
| 43 | 1  | 0 | -1.631718 | -1.474995 | -2.098597 |
| 44 | 6  | 0 | 1.625546  | 1.822250  | -0.131404 |
| 45 | 6  | 0 | 2.697549  | 2.653789  | -0.800147 |
| 46 | 6  | 0 | -0.447556 | 2.273947  | 1.286330  |
| 47 | 6  | 0 | 2.317139  | 4.073825  | -0.481660 |
| 48 | 6  | 0 | 0.762062  | 2.669359  | 0.490180  |
| 49 | 6  | 0 | 1.196485  | 4.055295  | 0.268195  |
| 50 | 1  | 0 | 0.669301  | 4.921682  | 0.653223  |
| 51 | 1  | 0 | 2.857759  | 4.947872  | -0.822036 |
| 52 | 1  | 0 | -0.131312 | 1.962124  | 2.290561  |
| 53 | 1  | 0 | -1.086579 | 3.151439  | 1.434434  |
| 54 | 1  | 0 | 2.730543  | 2.467960  | -1.882241 |
| 55 | 1  | 0 | 3.695684  | 2.396034  | -0.422595 |

Naphthalene

|    |   |   |           |           |           |
|----|---|---|-----------|-----------|-----------|
| 1  | 5 | 0 | -3.052316 | -3.049008 | 0.000315  |
| 2  | 1 | 0 | -4.175626 | -3.412278 | 0.000541  |
| 3  | 5 | 0 | -1.531392 | -3.938897 | 0.000001  |
| 4  | 1 | 0 | -1.539947 | -5.123487 | -0.000045 |
| 5  | 5 | 0 | -2.022605 | -3.006174 | 1.421304  |
| 6  | 1 | 0 | -2.444227 | -3.423854 | 2.444066  |
| 7  | 5 | 0 | -1.109002 | -1.468674 | 1.437197  |
| 8  | 1 | 0 | -0.931216 | -1.064503 | 2.526712  |
| 9  | 5 | 0 | -2.023135 | -3.006095 | -1.421053 |
| 10 | 1 | 0 | -2.445205 | -3.423698 | -2.443663 |
| 11 | 5 | 0 | -1.109540 | -1.468606 | -1.437234 |
| 12 | 1 | 0 | -0.932354 | -1.064475 | -2.526855 |
| 13 | 5 | 0 | -0.334505 | -2.963747 | -0.886773 |
| 14 | 1 | 0 | 0.520105  | -3.468814 | -1.534385 |
| 15 | 5 | 0 | -0.334175 | -2.963811 | 0.886349  |
| 16 | 1 | 0 | 0.520735  | -3.468859 | 1.533574  |
| 17 | 5 | 0 | -0.022356 | -1.428989 | -0.000201 |
| 18 | 1 | 0 | -0.932182 | 1.064601  | 2.526855  |
| 19 | 5 | 0 | -1.109456 | 1.468722  | 1.437235  |
| 20 | 5 | 0 | -2.023049 | 3.006201  | 1.421010  |
| 21 | 5 | 0 | -0.334457 | 2.963818  | 0.886605  |
| 22 | 5 | 0 | -0.022359 | 1.428988  | 0.000130  |
| 23 | 1 | 0 | -2.445050 | 3.423887  | 2.443615  |

|    |    |   |           |           |           |
|----|----|---|-----------|-----------|-----------|
| 24 | 5  | 0 | -3.052341 | 3.048996  | -0.000292 |
| 25 | 5  | 0 | -1.531417 | 3.938888  | -0.000153 |
| 26 | 1  | 0 | 0.520190  | 3.468950  | 1.534116  |
| 27 | 5  | 0 | -0.334264 | 2.963734  | -0.886514 |
| 28 | 5  | 0 | -1.109102 | 1.468548  | -1.437198 |
| 29 | 1  | 0 | -4.175652 | 3.412259  | -0.000472 |
| 30 | 5  | 0 | -2.022732 | 3.006043  | -1.421343 |
| 31 | 1  | 0 | -1.539974 | 5.123477  | -0.000215 |
| 32 | 1  | 0 | 0.520596  | 3.468742  | -1.533839 |
| 33 | 1  | 0 | -0.931418 | 1.064373  | -2.526720 |
| 34 | 1  | 0 | -2.444414 | 3.423632  | -2.444118 |
| 35 | 27 | 0 | -1.587379 | 0.000005  | 0.000100  |
| 36 | 6  | 0 | -2.673308 | 1.569189  | 0.799963  |
| 37 | 6  | 0 | -2.673094 | 1.569077  | -0.800309 |
| 38 | 6  | 0 | -2.673023 | -1.569160 | 0.800421  |
| 39 | 6  | 0 | -2.673346 | -1.569135 | -0.799853 |
| 40 | 1  | 0 | -3.542864 | -1.168094 | 1.300978  |
| 41 | 1  | 0 | -3.543388 | -1.168015 | -1.300011 |
| 42 | 1  | 0 | -3.543305 | 1.168100  | 1.300226  |
| 43 | 1  | 0 | -3.542967 | 1.167958  | -1.300765 |
| 44 | 6  | 0 | 2.585562  | -1.396117 | -0.000349 |
| 45 | 6  | 0 | 3.830693  | -0.715021 | -0.000181 |
| 46 | 6  | 0 | 1.387335  | -0.717798 | -0.000206 |
| 47 | 6  | 0 | 5.073609  | -1.397398 | -0.000318 |
| 48 | 6  | 0 | 3.830690  | 0.715035  | 0.000153  |
| 49 | 6  | 0 | 1.387334  | 0.717803  | 0.000131  |
| 50 | 6  | 0 | 6.264444  | -0.707170 | -0.000143 |
| 51 | 1  | 0 | 5.068224  | -2.482944 | -0.000563 |
| 52 | 6  | 0 | 5.073605  | 1.397415  | 0.000330  |
| 53 | 6  | 0 | 2.585557  | 1.396126  | 0.000290  |
| 54 | 6  | 0 | 6.264442  | 0.707191  | 0.000196  |
| 55 | 1  | 0 | 7.206429  | -1.245234 | -0.000253 |
| 56 | 1  | 0 | 5.068216  | 2.482961  | 0.000577  |
| 57 | 1  | 0 | 2.593057  | 2.482280  | 0.000507  |
| 58 | 1  | 0 | 7.206425  | 1.245258  | 0.000340  |
| 59 | 1  | 0 | 2.593066  | -2.482271 | -0.000565 |

Naphthalene-extrusion

|    |   |   |           |           |           |
|----|---|---|-----------|-----------|-----------|
| 1  | 5 | 0 | 2.914524  | 3.030963  | 0.250452  |
| 2  | 1 | 0 | 4.036465  | 3.386787  | 0.340843  |
| 3  | 5 | 0 | 1.400437  | 3.930718  | 0.206031  |
| 4  | 1 | 0 | 1.408680  | 5.113189  | 0.276611  |
| 5  | 5 | 0 | 1.794430  | 2.910736  | 1.601003  |
| 6  | 1 | 0 | 2.152108  | 3.271256  | 2.668634  |
| 7  | 5 | 0 | 0.876291  | 1.377335  | 1.463332  |
| 8  | 1 | 0 | 0.625242  | 0.881520  | 2.502352  |
| 9  | 5 | 0 | 1.976605  | 3.079394  | -1.237932 |
| 10 | 1 | 0 | 2.470696  | 3.556816  | -2.200684 |
| 11 | 5 | 0 | 1.060696  | 1.549078  | -1.395253 |
| 12 | 1 | 0 | 0.961539  | 1.152815  | -2.504716 |
| 13 | 5 | 0 | 0.263026  | 3.017299  | -0.817666 |
| 14 | 1 | 0 | -0.545378 | 3.576371  | -1.480352 |
| 15 | 5 | 0 | 0.147797  | 2.915029  | 0.956340  |
| 16 | 1 | 0 | -0.748092 | 3.392269  | 1.568419  |
| 17 | 5 | 0 | -0.126409 | 1.437132  | -0.034613 |
| 18 | 1 | 0 | 2.137010  | -1.118527 | 2.429119  |
| 19 | 5 | 0 | 1.821766  | -1.529773 | 1.365749  |
| 20 | 5 | 0 | 2.756807  | -2.953189 | 0.810617  |
| 21 | 5 | 0 | 1.024027  | -3.082706 | 1.121349  |
| 22 | 5 | 0 | 0.185228  | -1.573717 | 0.606485  |



|    |    |   |           |           |           |
|----|----|---|-----------|-----------|-----------|
| 23 | 1  | 0 | 3.650581  | -3.355091 | 1.473155  |
| 24 | 5  | 0 | 2.998646  | -2.827749 | -0.928970 |
| 25 | 5  | 0 | 1.738976  | -3.886350 | -0.299746 |
| 26 | 1  | 0 | 0.608435  | -3.709729 | 2.038908  |
| 27 | 5  | 0 | 0.189308  | -3.026548 | -0.452450 |
| 28 | 5  | 0 | 0.471466  | -1.434282 | -1.169796 |
| 29 | 1  | 0 | 4.018838  | -3.058305 | -1.476496 |
| 30 | 5  | 0 | 1.421810  | -2.859112 | -1.708168 |
| 31 | 1  | 0 | 1.844118  | -5.062200 | -0.398611 |
| 32 | 1  | 0 | -0.821326 | -3.611876 | -0.655971 |
| 33 | 1  | 0 | -0.232712 | -0.983310 | -1.999035 |
| 34 | 1  | 0 | 1.355286  | -3.199790 | -2.838276 |
| 35 | 27 | 0 | 1.463939  | 0.013021  | -0.018930 |
| 36 | 6  | 0 | 2.911007  | -1.438103 | 0.073182  |
| 37 | 6  | 0 | 2.155863  | -1.384507 | -1.346873 |
| 38 | 6  | 0 | 2.478750  | 1.514546  | 0.943262  |
| 39 | 6  | 0 | 2.582788  | 1.613453  | -0.657817 |
| 40 | 1  | 0 | 3.305754  | 1.065764  | 1.474071  |
| 41 | 1  | 0 | 3.481583  | 1.229901  | -1.121049 |
| 42 | 1  | 0 | 3.871150  | -0.945248 | 0.143161  |
| 43 | 1  | 0 | 2.643897  | -0.858329 | -2.154115 |
| 44 | 6  | 0 | -1.588003 | 0.894336  | -0.080358 |
| 45 | 6  | 0 | -2.745179 | 1.606161  | -0.754951 |
| 46 | 6  | 0 | -1.206844 | -1.209243 | 1.304538  |
| 47 | 6  | 0 | -3.933543 | 0.732125  | -0.450781 |
| 48 | 6  | 0 | -2.041370 | -0.230379 | 0.533675  |
| 49 | 6  | 0 | -3.488615 | -0.358159 | 0.327049  |
| 50 | 6  | 0 | -4.396551 | -1.328313 | 0.753773  |
| 51 | 6  | 0 | -5.266807 | 0.852130  | -0.805077 |
| 52 | 1  | 0 | -1.012589 | -0.805431 | 2.306215  |
| 53 | 1  | 0 | -1.774737 | -2.131769 | 1.460782  |
| 54 | 1  | 0 | -2.574554 | 1.709266  | -1.833752 |
| 55 | 1  | 0 | -2.870428 | 2.624719  | -0.368437 |
| 56 | 1  | 0 | -4.064439 | -2.170063 | 1.350968  |
| 57 | 6  | 0 | -5.741211 | -1.201800 | 0.396346  |
| 58 | 6  | 0 | -6.177341 | -0.123967 | -0.376532 |
| 59 | 1  | 0 | -5.607744 | 1.689832  | -1.406129 |
| 60 | 1  | 0 | -7.224946 | -0.041953 | -0.645867 |
| 61 | 1  | 0 | -6.455594 | -1.951420 | 0.720931  |

Anthracene

|    |   |   |           |           |           |
|----|---|---|-----------|-----------|-----------|
| 1  | 5 | 0 | -3.901610 | -3.048322 | -0.000203 |
| 2  | 1 | 0 | -5.024906 | -3.411245 | -0.000258 |
| 3  | 5 | 0 | -2.381163 | -3.939343 | -0.000236 |
| 4  | 1 | 0 | -2.390163 | -5.123781 | -0.000346 |
| 5  | 5 | 0 | -2.871813 | -3.006383 | 1.421026  |
| 6  | 1 | 0 | -3.293348 | -3.423539 | 2.443882  |
| 7  | 5 | 0 | -1.958254 | -1.468934 | 1.437183  |
| 8  | 1 | 0 | -1.779703 | -1.064812 | 2.526518  |
| 9  | 5 | 0 | -2.871724 | -3.006055 | -1.421363 |
| 10 | 1 | 0 | -3.293230 | -3.423037 | -2.444304 |
| 11 | 5 | 0 | -1.958101 | -1.468683 | -1.437163 |
| 12 | 1 | 0 | -1.779649 | -1.064470 | -2.526476 |
| 13 | 5 | 0 | -1.183586 | -2.964878 | -0.886596 |
| 14 | 1 | 0 | -0.328689 | -3.469301 | -1.534161 |
| 15 | 5 | 0 | -1.183628 | -2.965049 | 0.886340  |
| 16 | 1 | 0 | -0.328746 | -3.469555 | 1.533861  |
| 17 | 5 | 0 | -0.872319 | -1.430436 | 0.000027  |
| 18 | 1 | 0 | -1.779266 | 1.064585  | 2.526433  |
| 19 | 5 | 0 | -1.957904 | 1.468793  | 1.437141  |

|    |    |   |           |           |           |
|----|----|---|-----------|-----------|-----------|
| 20 | 5  | 0 | -2.871501 | 3.006172  | 1.421377  |
| 21 | 5  | 0 | -1.183448 | 2.964937  | 0.886348  |
| 22 | 5  | 0 | -0.872320 | 1.430426  | -0.000216 |
| 23 | 1  | 0 | -3.292848 | 3.423228  | 2.444354  |
| 24 | 5  | 0 | -3.901612 | 3.048337  | 0.000371  |
| 25 | 5  | 0 | -2.381158 | 3.939339  | 0.000101  |
| 26 | 1  | 0 | -0.328456 | 3.469409  | 1.533748  |
| 27 | 5  | 0 | -1.183769 | 2.964965  | -0.886589 |
| 28 | 5  | 0 | -1.958463 | 1.468812  | -1.437208 |
| 29 | 1  | 0 | -5.024910 | 3.411256  | 0.000552  |
| 30 | 5  | 0 | -2.872041 | 3.006261  | -1.421005 |
| 31 | 1  | 0 | -2.390153 | 5.123777  | 0.000092  |
| 32 | 1  | 0 | -0.328990 | 3.469433  | -1.534277 |
| 33 | 1  | 0 | -1.780134 | 1.064685  | -2.526569 |
| 34 | 1  | 0 | -3.293718 | 3.423323  | -2.443842 |
| 35 | 27 | 0 | -2.435359 | 0.000007  | 0.000103  |
| 36 | 6  | 0 | -3.521917 | 1.569010  | 0.800437  |
| 37 | 6  | 0 | -3.522201 | 1.569029  | -0.799857 |
| 38 | 6  | 0 | -3.522072 | -1.569094 | 0.800086  |
| 39 | 6  | 0 | -3.522021 | -1.568946 | -0.800218 |
| 40 | 1  | 0 | -4.391831 | -1.167869 | 1.300603  |
| 41 | 1  | 0 | -4.391710 | -1.167620 | -1.300769 |
| 42 | 1  | 0 | -4.391527 | 1.167729  | 1.301161  |
| 43 | 1  | 0 | -4.392038 | 1.167770  | -1.300210 |
| 44 | 6  | 0 | 1.729393  | -1.400894 | 0.000192  |
| 45 | 6  | 0 | 2.984740  | -0.721344 | 0.000086  |
| 46 | 6  | 0 | 0.538706  | -0.723144 | 0.000033  |
| 47 | 6  | 0 | 4.205828  | -1.400000 | 0.000270  |
| 48 | 6  | 0 | 2.984738  | 0.721342  | -0.000217 |
| 49 | 6  | 0 | 0.538705  | 0.723135  | -0.000246 |
| 50 | 6  | 0 | 5.429521  | -0.721205 | 0.000184  |
| 51 | 1  | 0 | 4.203635  | -2.486023 | 0.000490  |
| 52 | 6  | 0 | 4.205824  | 1.400007  | -0.000328 |
| 53 | 6  | 0 | 1.729391  | 1.400888  | -0.000380 |
| 54 | 6  | 0 | 5.429516  | 0.721220  | -0.000143 |
| 55 | 1  | 0 | 1.736934  | -2.486810 | 0.000388  |
| 56 | 1  | 0 | 4.203622  | 2.486030  | -0.000556 |
| 57 | 1  | 0 | 1.736927  | 2.486805  | -0.000584 |
| 58 | 1  | 0 | 8.809302  | 1.246513  | -0.000230 |
| 59 | 1  | 0 | 8.809304  | -1.246513 | 0.000351  |
| 60 | 6  | 0 | 6.683464  | -1.401932 | 0.000370  |
| 61 | 6  | 0 | 7.865800  | -0.711855 | 0.000209  |
| 62 | 6  | 0 | 7.865799  | 0.711853  | -0.000117 |
| 63 | 6  | 0 | 6.683471  | 1.401937  | -0.000266 |
| 64 | 1  | 0 | 6.680479  | 2.487262  | -0.000511 |
| 65 | 1  | 0 | 6.680460  | -2.487257 | 0.000648  |

Anthracene-extrusion

|    |   |   |          |           |           |
|----|---|---|----------|-----------|-----------|
| 1  | 5 | 0 | 4.022397 | -2.742673 | -0.334437 |
| 2  | 1 | 0 | 5.174332 | -2.977264 | -0.439877 |
| 3  | 5 | 0 | 2.609815 | -3.795385 | -0.308793 |
| 4  | 1 | 0 | 2.739659 | -4.968147 | -0.412114 |
| 5  | 5 | 0 | 2.886223 | -2.703644 | -1.677869 |
| 6  | 1 | 0 | 3.272458 | -2.996093 | -2.756088 |
| 7  | 5 | 0 | 1.814066 | -1.279293 | -1.496376 |
| 8  | 1 | 0 | 1.504753 | -0.784765 | -2.520232 |
| 9  | 5 | 0 | 3.103698 | -2.928538 | 1.155228  |
| 10 | 1 | 0 | 3.651124 | -3.377061 | 2.102662  |
| 11 | 5 | 0 | 2.034093 | -1.506406 | 1.357519  |
| 12 | 1 | 0 | 1.901494 | -1.151673 | 2.477424  |

|    |    |   |           |           |           |
|----|----|---|-----------|-----------|-----------|
| 13 | 5  | 0 | 1.390350  | -3.033606 | 0.742928  |
| 14 | 1  | 0 | 0.649419  | -3.692214 | 1.392643  |
| 15 | 5  | 0 | 1.253229  | -2.896895 | -1.026529 |
| 16 | 1  | 0 | 0.408321  | -3.449139 | -1.647876 |
| 17 | 5  | 0 | 0.837258  | -1.480957 | 0.005231  |
| 18 | 1  | 0 | 2.798320  | 1.359599  | -2.401159 |
| 19 | 5  | 0 | 2.449358  | 1.705950  | -1.325261 |
| 20 | 5  | 0 | 3.236271  | 3.201778  | -0.736107 |
| 21 | 5  | 0 | 1.496292  | 3.161327  | -1.036208 |
| 22 | 5  | 0 | 0.823761  | 1.559111  | -0.557515 |
| 23 | 1  | 0 | 4.078212  | 3.711002  | -1.392395 |
| 24 | 5  | 0 | 3.502867  | 3.058777  | 0.998150  |
| 25 | 5  | 0 | 2.135141  | 3.997221  | 0.402543  |
| 26 | 1  | 0 | 1.012046  | 3.765963  | -1.934771 |
| 27 | 5  | 0 | 0.684369  | 2.977200  | 0.539002  |
| 28 | 5  | 0 | 1.136984  | 1.405254  | 1.212928  |
| 29 | 1  | 0 | 4.497747  | 3.379672  | 1.546442  |
| 30 | 5  | 0 | 1.936707  | 2.906844  | 1.785454  |
| 31 | 1  | 0 | 2.118254  | 5.174457  | 0.532311  |
| 32 | 1  | 0 | -0.380904 | 3.445966  | 0.764031  |
| 33 | 1  | 0 | 0.488065  | 0.862702  | 2.032251  |
| 34 | 1  | 0 | 1.842277  | 3.208619  | 2.924440  |
| 35 | 27 | 0 | 2.266250  | 0.099384  | 0.019502  |
| 36 | 6  | 0 | 3.552485  | 1.693760  | -0.040187 |
| 37 | 6  | 0 | 2.817164  | 1.526010  | 1.382328  |
| 38 | 6  | 0 | 3.425996  | -1.262653 | -0.983905 |
| 39 | 6  | 0 | 3.550015  | -1.392356 | 0.612942  |
| 40 | 1  | 0 | 4.197406  | -0.715185 | -1.504823 |
| 41 | 1  | 0 | 4.404315  | -0.925770 | 1.084113  |
| 42 | 1  | 0 | 4.558627  | 1.306695  | -0.126931 |
| 43 | 1  | 0 | 3.362166  | 1.028879  | 2.171395  |
| 44 | 6  | 0 | -0.674052 | -1.100752 | 0.072717  |
| 45 | 6  | 0 | -1.735589 | -1.959778 | 0.733175  |
| 46 | 6  | 0 | -0.527169 | 1.064830  | -1.257718 |
| 47 | 6  | 0 | -3.018899 | -1.220906 | 0.454240  |
| 48 | 6  | 0 | -1.249684 | -0.015519 | -0.509813 |
| 49 | 6  | 0 | -2.699040 | -0.049384 | -0.303965 |
| 50 | 6  | 0 | -3.695816 | 0.811739  | -0.705622 |
| 51 | 6  | 0 | -4.308592 | -1.509492 | 0.796000  |
| 52 | 1  | 0 | -0.297075 | 0.706173  | -2.269040 |
| 53 | 1  | 0 | -1.190812 | 1.925033  | -1.389370 |
| 54 | 1  | 0 | -1.546609 | -2.069909 | 1.807900  |
| 55 | 1  | 0 | -1.746534 | -2.975527 | 0.320713  |
| 56 | 1  | 0 | -3.465857 | 1.702945  | -1.279466 |
| 57 | 6  | 0 | -5.047020 | 0.536386  | -0.367772 |
| 58 | 6  | 0 | -5.363084 | -0.639131 | 0.393015  |
| 59 | 1  | 0 | -4.552618 | -2.398314 | 1.371095  |
| 60 | 6  | 0 | -6.716333 | -0.899135 | 0.717333  |
| 61 | 6  | 0 | -6.110505 | 1.390065  | -0.761105 |
| 62 | 1  | 0 | -5.872461 | 2.279882  | -1.335089 |
| 63 | 6  | 0 | -7.415842 | 1.108162  | -0.429361 |
| 64 | 6  | 0 | -7.724713 | -0.049931 | 0.318867  |
| 65 | 1  | 0 | -6.948291 | -1.790266 | 1.292477  |
| 66 | 1  | 0 | -8.755146 | -0.267068 | 0.577807  |
| 67 | 1  | 0 | -8.211751 | 1.775639  | -0.741470 |

Phenanthrene

|   |   |   |          |          |           |
|---|---|---|----------|----------|-----------|
| 1 | 5 | 0 | 3.044043 | 3.533405 | 0.000311  |
| 2 | 1 | 0 | 4.057740 | 4.138162 | 0.000496  |
| 3 | 5 | 0 | 1.361936 | 4.062405 | -0.000022 |

|    |    |   |           |           |           |
|----|----|---|-----------|-----------|-----------|
| 4  | 1  | 0 | 1.106369  | 5.219006  | -0.000104 |
| 5  | 5  | 0 | 2.047769  | 3.263761  | 1.421241  |
| 6  | 1  | 0 | 2.365549  | 3.765227  | 2.443706  |
| 7  | 5  | 0 | 1.498922  | 1.562320  | 1.437635  |
| 8  | 1  | 0 | 1.415132  | 1.127643  | 2.526590  |
| 9  | 5  | 0 | 2.048307  | 3.263687  | -1.420983 |
| 10 | 1  | 0 | 2.366496  | 3.765106  | -2.443345 |
| 11 | 5  | 0 | 1.499483  | 1.562235  | -1.437526 |
| 12 | 1  | 0 | 1.416208  | 1.127584  | -2.526528 |
| 13 | 5  | 0 | 0.411774  | 2.846410  | -0.886095 |
| 14 | 1  | 0 | -0.534308 | 3.148436  | -1.533213 |
| 15 | 5  | 0 | 0.411442  | 2.846466  | 0.885727  |
| 16 | 1  | 0 | -0.534901 | 3.148494  | 1.532459  |
| 17 | 5  | 0 | 0.450295  | 1.280451  | -0.000128 |
| 18 | 1  | 0 | 1.887840  | -0.946863 | 2.526353  |
| 19 | 5  | 0 | 2.150560  | -1.303095 | 1.437318  |
| 20 | 5  | 0 | 3.381675  | -2.599524 | 1.421333  |
| 21 | 5  | 0 | 1.726253  | -2.931589 | 0.886330  |
| 22 | 5  | 0 | 1.082781  | -1.504644 | 0.000371  |
| 23 | 1  | 0 | 3.885567  | -2.913318 | 2.443853  |
| 24 | 5  | 0 | 4.395918  | -2.411646 | 0.000136  |
| 25 | 5  | 0 | 3.109406  | -3.616353 | 0.000312  |
| 26 | 1  | 0 | 1.003935  | -3.612692 | 1.533774  |
| 27 | 5  | 0 | 1.726122  | -2.931675 | -0.885530 |
| 28 | 5  | 0 | 2.150300  | -1.303227 | -1.436752 |
| 29 | 1  | 0 | 5.571602  | -2.517385 | 0.000036  |
| 30 | 5  | 0 | 3.381438  | -2.599654 | -1.420860 |
| 31 | 1  | 0 | 3.379820  | -4.769580 | 0.000340  |
| 32 | 1  | 0 | 1.003668  | -3.612814 | -1.532784 |
| 33 | 1  | 0 | 1.887297  | -0.947172 | -2.525767 |
| 34 | 1  | 0 | 3.885125  | -2.913548 | -2.443449 |
| 35 | 27 | 0 | 2.292186  | 0.236389  | 0.000240  |
| 36 | 6  | 0 | 3.698411  | -1.052811 | 0.800561  |
| 37 | 6  | 0 | 3.698257  | -1.052877 | -0.800310 |
| 38 | 6  | 0 | 3.002798  | 2.007065  | 0.801405  |
| 39 | 6  | 0 | 3.003119  | 2.007031  | -0.800716 |
| 40 | 1  | 0 | 3.939701  | 1.807635  | 1.301920  |
| 41 | 1  | 0 | 3.940227  | 1.807587  | -1.300839 |
| 42 | 1  | 0 | 4.457126  | -0.468717 | 1.301901  |
| 43 | 1  | 0 | 4.456880  | -0.468832 | -1.301843 |
| 44 | 6  | 0 | -2.089013 | 0.670280  | -0.000362 |
| 45 | 6  | 0 | -3.155751 | -0.255240 | -0.000274 |
| 46 | 6  | 0 | -0.764274 | 0.270671  | -0.000122 |
| 47 | 1  | 0 | -6.579120 | 2.892407  | -0.001455 |
| 48 | 6  | 0 | -2.832969 | -1.640717 | 0.000089  |
| 49 | 6  | 0 | -0.446977 | -1.118932 | 0.000246  |
| 50 | 1  | 0 | -8.342803 | 1.129914  | -0.001106 |
| 51 | 1  | 0 | -2.301261 | 1.731971  | -0.000608 |
| 52 | 6  | 0 | -3.884636 | -2.611647 | 0.000205  |
| 53 | 6  | 0 | -1.477353 | -2.038388 | 0.000343  |
| 54 | 6  | 0 | -5.193007 | -2.243372 | 0.000003  |
| 55 | 1  | 0 | -5.979776 | -2.990968 | 0.000107  |
| 56 | 1  | 0 | -3.608523 | -3.661247 | 0.000468  |
| 57 | 1  | 0 | -1.253151 | -3.101090 | 0.000609  |
| 58 | 6  | 0 | -5.566959 | -0.860993 | -0.000365 |
| 59 | 6  | 0 | -4.553078 | 0.141967  | -0.000526 |
| 60 | 6  | 0 | -4.963750 | 1.494017  | -0.000935 |
| 61 | 6  | 0 | -6.299175 | 1.844741  | -0.001140 |
| 62 | 6  | 0 | -7.294717 | 0.851636  | -0.000954 |
| 63 | 6  | 0 | -6.926385 | -0.477071 | -0.000579 |

|    |   |   |           |           |           |
|----|---|---|-----------|-----------|-----------|
| 64 | 1 | 0 | -7.683501 | -1.255088 | -0.000447 |
| 65 | 1 | 0 | -4.217321 | 2.276826  | -0.001092 |

Phenanthrene-extrusion

|    |    |   |           |           |           |
|----|----|---|-----------|-----------|-----------|
| 1  | 5  | 0 | -3.342857 | 3.269163  | -0.205086 |
| 2  | 1  | 0 | -4.424087 | 3.742725  | -0.203469 |
| 3  | 5  | 0 | -1.745297 | 3.996121  | -0.353842 |
| 4  | 1  | 0 | -1.633859 | 5.168423  | -0.481674 |
| 5  | 5  | 0 | -2.386885 | 2.974523  | -1.652422 |
| 6  | 1  | 0 | -2.812105 | 3.330789  | -2.696302 |
| 7  | 5  | 0 | -1.627204 | 1.355359  | -1.530705 |
| 8  | 1  | 0 | -1.538515 | 0.795843  | -2.564122 |
| 9  | 5  | 0 | -2.255896 | 3.270910  | 1.179607  |
| 10 | 1  | 0 | -2.594992 | 3.836578  | 2.161241  |
| 11 | 5  | 0 | -1.497667 | 1.654000  | 1.321681  |
| 12 | 1  | 0 | -1.327437 | 1.292539  | 2.434218  |
| 13 | 5  | 0 | -0.611977 | 3.001797  | 0.595872  |
| 14 | 1  | 0 | 0.315250  | 3.492926  | 1.147547  |
| 15 | 5  | 0 | -0.692078 | 2.820761  | -1.172924 |
| 16 | 1  | 0 | 0.182535  | 3.171436  | -1.891944 |
| 17 | 5  | 0 | -0.479060 | 1.359618  | -0.141859 |
| 18 | 1  | 0 | -3.234700 | -1.020437 | -2.243061 |
| 19 | 5  | 0 | -2.859386 | -1.422965 | -1.195873 |
| 20 | 5  | 0 | -3.883869 | -2.707222 | -0.484946 |
| 21 | 5  | 0 | -2.216072 | -3.047981 | -0.955657 |
| 22 | 5  | 0 | -1.168272 | -1.625179 | -0.596877 |
| 23 | 1  | 0 | -4.878430 | -3.029233 | -1.038395 |
| 24 | 5  | 0 | -3.934029 | -2.493019 | 1.261552  |
| 25 | 5  | 0 | -2.868197 | -3.710910 | 0.565546  |
| 26 | 1  | 0 | -1.967649 | -3.753131 | -1.877031 |
| 27 | 5  | 0 | -1.227631 | -3.026475 | 0.526174  |
| 28 | 5  | 0 | -1.261282 | -1.387161 | 1.190389  |
| 29 | 1  | 0 | -4.913027 | -2.584481 | 1.914766  |
| 30 | 5  | 0 | -2.299848 | -2.674797 | 1.886069  |
| 31 | 1  | 0 | -3.090532 | -4.862613 | 0.730936  |
| 32 | 1  | 0 | -0.270368 | -3.712981 | 0.661691  |
| 33 | 1  | 0 | -0.430476 | -0.988943 | 1.923802  |
| 34 | 1  | 0 | -2.155768 | -2.977903 | 3.019539  |
| 35 | 27 | 0 | -2.200811 | 0.121404  | 0.068327  |
| 36 | 6  | 0 | -3.796000 | -1.159357 | 0.190112  |
| 37 | 6  | 0 | -2.899612 | -1.139734 | 1.526369  |
| 38 | 6  | 0 | -3.143409 | 1.689327  | -0.862830 |
| 39 | 6  | 0 | -3.072073 | 1.860008  | 0.734703  |
| 40 | 1  | 0 | -4.063595 | 1.315116  | -1.286841 |
| 41 | 1  | 0 | -3.954372 | 1.595912  | 1.301242  |
| 42 | 1  | 0 | -4.699707 | -0.565394 | 0.189146  |
| 43 | 1  | 0 | -3.241789 | -0.532243 | 2.351455  |
| 44 | 6  | 0 | 0.912807  | 0.662174  | -0.203919 |
| 45 | 6  | 0 | 2.198992  | 1.266524  | 0.324215  |
| 46 | 6  | 0 | 0.183858  | -1.446365 | -1.433321 |
| 47 | 6  | 0 | 3.247818  | 0.248799  | -0.030310 |
| 48 | 6  | 0 | 1.185865  | -0.533153 | -0.791095 |
| 49 | 6  | 0 | 2.625253  | -0.805410 | -0.694294 |
| 50 | 6  | 0 | 3.382483  | -1.911439 | -1.144894 |
| 51 | 6  | 0 | 4.635015  | 0.247684  | 0.214972  |
| 52 | 1  | 0 | -0.060603 | -1.067444 | -2.433485 |
| 53 | 1  | 0 | 0.632234  | -2.432391 | -1.591433 |
| 54 | 1  | 0 | 2.138552  | 1.442559  | 1.405244  |
| 55 | 1  | 0 | 2.395721  | 2.244418  | -0.131669 |
| 56 | 1  | 0 | 2.894305  | -2.731801 | -1.658568 |

|    |   |   |          |           |           |
|----|---|---|----------|-----------|-----------|
| 57 | 6 | 0 | 4.739948 | -1.938788 | -0.921550 |
| 58 | 6 | 0 | 5.401170 | -0.878432 | -0.245872 |
| 59 | 6 | 0 | 5.312357 | 1.299577  | 0.890841  |
| 60 | 6 | 0 | 6.799033 | -0.894541 | -0.008745 |
| 61 | 1 | 0 | 5.332374 | -2.782939 | -1.260558 |
| 62 | 1 | 0 | 4.737264 | 2.149699  | 1.239733  |
| 63 | 6 | 0 | 6.668887 | 1.248335  | 1.102052  |
| 64 | 6 | 0 | 7.423849 | 0.139657  | 0.648012  |
| 65 | 1 | 0 | 7.373997 | -1.746910 | -0.357577 |
| 66 | 1 | 0 | 7.167820 | 2.060494  | 1.619752  |
| 67 | 1 | 0 | 8.493957 | 0.109590  | 0.820834  |

Pyrene

|    |    |   |           |           |           |
|----|----|---|-----------|-----------|-----------|
| 1  | 5  | 0 | 3.469589  | -3.228075 | 0.000000  |
| 2  | 1  | 0 | 4.057384  | -4.251502 | 0.000000  |
| 3  | 5  | 0 | 4.025338  | -1.557407 | 0.000000  |
| 4  | 1  | 0 | 5.185062  | -1.317481 | 0.000000  |
| 5  | 5  | 0 | 3.212085  | -2.227643 | 1.420358  |
| 6  | 1  | 0 | 3.708252  | -2.550147 | 2.443736  |
| 7  | 5  | 0 | 1.521624  | -1.638895 | 1.434673  |
| 8  | 1  | 0 | 1.090451  | -1.548566 | 2.524320  |
| 9  | 5  | 0 | 3.212085  | -2.227643 | -1.420358 |
| 10 | 1  | 0 | 3.708252  | -2.550147 | -2.443736 |
| 11 | 5  | 0 | 1.521624  | -1.638895 | -1.434673 |
| 12 | 1  | 0 | 1.090451  | -1.548566 | -2.524320 |
| 13 | 5  | 0 | 2.828619  | -0.586299 | -0.887876 |
| 14 | 1  | 0 | 3.166624  | 0.333100  | -1.551813 |
| 15 | 5  | 0 | 2.828619  | -0.586299 | 0.887876  |
| 16 | 1  | 0 | 3.166624  | 0.333100  | 1.551813  |
| 17 | 5  | 0 | 1.253635  | -0.564873 | 0.000000  |
| 18 | 1  | 0 | -0.977693 | -2.035614 | 2.529764  |
| 19 | 5  | 0 | -1.335288 | -2.295782 | 1.440695  |
| 20 | 5  | 0 | -2.636028 | -3.520975 | 1.421321  |
| 21 | 5  | 0 | -2.957534 | -1.864300 | 0.885935  |
| 22 | 5  | 0 | -1.520314 | -1.231173 | 0.000000  |
| 23 | 1  | 0 | -2.952040 | -4.024391 | 2.443244  |
| 24 | 5  | 0 | -2.449522 | -4.534948 | 0.000000  |
| 25 | 5  | 0 | -3.649896 | -3.243038 | 0.000000  |
| 26 | 1  | 0 | -3.635742 | -1.137567 | 1.531147  |
| 27 | 5  | 0 | -2.957534 | -1.864300 | -0.885935 |
| 28 | 5  | 0 | -1.335288 | -2.295782 | -1.440695 |
| 29 | 1  | 0 | -2.558368 | -5.710261 | 0.000000  |
| 30 | 5  | 0 | -2.636028 | -3.520975 | -1.421321 |
| 31 | 1  | 0 | -4.804561 | -3.506760 | 0.000000  |
| 32 | 1  | 0 | -3.635742 | -1.137567 | -1.531147 |
| 33 | 1  | 0 | -0.977693 | -2.035614 | -2.529764 |
| 34 | 1  | 0 | -2.952040 | -4.024391 | -2.443244 |
| 35 | 27 | 0 | 0.198474  | -2.431099 | 0.000000  |
| 36 | 6  | 0 | -1.089869 | -3.841276 | 0.800808  |
| 37 | 6  | 0 | -1.089869 | -3.841276 | -0.800808 |
| 38 | 6  | 0 | 1.945665  | -3.159225 | 0.801614  |
| 39 | 6  | 0 | 1.945665  | -3.159225 | -0.801614 |
| 40 | 1  | 0 | 1.728946  | -4.091160 | 1.304058  |
| 41 | 1  | 0 | 1.728946  | -4.091160 | -1.304058 |
| 42 | 1  | 0 | -0.507119 | -4.601985 | 1.300411  |
| 43 | 1  | 0 | -0.507119 | -4.601985 | -1.300411 |
| 44 | 6  | 0 | 0.562622  | 2.039917  | 0.000000  |
| 45 | 6  | 0 | -0.467562 | 3.036869  | 0.000000  |
| 46 | 6  | 0 | 0.225348  | 0.661025  | 0.000000  |
| 47 | 1  | 0 | 2.550639  | 6.533048  | 0.000000  |

|    |   |   |           |          |          |
|----|---|---|-----------|----------|----------|
| 48 | 6 | 0 | -1.833420 | 2.641402 | 0.000000 |
| 49 | 6 | 0 | -1.143993 | 0.299777 | 0.000000 |
| 50 | 1 | 0 | 0.741122  | 8.224729 | 0.000000 |
| 51 | 6 | 0 | 1.919883  | 2.515875 | 0.000000 |
| 52 | 6 | 0 | -2.854710 | 3.646508 | 0.000000 |
| 53 | 6 | 0 | -2.135554 | 1.276325 | 0.000000 |
| 54 | 6 | 0 | -2.548641 | 4.970967 | 0.000000 |
| 55 | 1 | 0 | -3.333238 | 5.720826 | 0.000000 |
| 56 | 1 | 0 | -3.889876 | 3.320347 | 0.000000 |
| 57 | 1 | 0 | -3.178363 | 0.975005 | 0.000000 |
| 58 | 6 | 0 | -1.183827 | 5.410634 | 0.000000 |
| 59 | 6 | 0 | -0.146821 | 4.427606 | 0.000000 |
| 60 | 6 | 0 | 1.215165  | 4.848779 | 0.000000 |
| 61 | 6 | 0 | 1.511800  | 6.219711 | 0.000000 |
| 62 | 6 | 0 | 0.493694  | 7.168496 | 0.000000 |
| 63 | 6 | 0 | -0.839667 | 6.771096 | 0.000000 |
| 64 | 1 | 0 | -1.631170 | 7.513456 | 0.000000 |
| 65 | 6 | 0 | 2.229628  | 3.839407 | 0.000000 |
| 66 | 1 | 0 | 3.268998  | 4.152302 | 0.000000 |
| 67 | 1 | 0 | 2.718076  | 1.794771 | 0.000000 |

Pyrene-extrusion

|    |    |   |           |           |           |
|----|----|---|-----------|-----------|-----------|
| 1  | 5  | 0 | -3.479206 | 3.201928  | -0.318153 |
| 2  | 1  | 0 | -4.559542 | 3.675501  | -0.278179 |
| 3  | 5  | 0 | -1.896248 | 3.917389  | -0.611013 |
| 4  | 1  | 0 | -1.795038 | 5.079224  | -0.817187 |
| 5  | 5  | 0 | -2.611451 | 2.818398  | -1.799868 |
| 6  | 1  | 0 | -3.100563 | 3.107461  | -2.836411 |
| 7  | 5  | 0 | -1.841096 | 1.210843  | -1.623959 |
| 8  | 1  | 0 | -1.818060 | 0.589672  | -2.624304 |
| 9  | 5  | 0 | -2.309620 | 3.288980  | 0.993551  |
| 10 | 1  | 0 | -2.586577 | 3.916614  | 1.956766  |
| 11 | 5  | 0 | -1.532330 | 1.687326  | 1.190884  |
| 12 | 1  | 0 | -1.292958 | 1.394364  | 2.311191  |
| 13 | 5  | 0 | -0.703891 | 2.986862  | 0.326483  |
| 14 | 1  | 0 | 0.239740  | 3.537411  | 0.779409  |
| 15 | 5  | 0 | -0.889313 | 2.691449  | -1.416799 |
| 16 | 1  | 0 | -0.063812 | 2.998853  | -2.210501 |
| 17 | 5  | 0 | -0.599444 | 1.297417  | -0.310523 |
| 18 | 1  | 0 | -3.552448 | -1.181001 | -2.060283 |
| 19 | 5  | 0 | -3.078198 | -1.528518 | -1.033511 |
| 20 | 5  | 0 | -4.021429 | -2.773604 | -0.160825 |
| 21 | 5  | 0 | -2.403366 | -3.137044 | -0.769727 |
| 22 | 5  | 0 | -1.338700 | -1.695256 | -0.588573 |
| 23 | 1  | 0 | -5.062463 | -3.125011 | -0.598639 |
| 24 | 5  | 0 | -3.905683 | -2.464193 | 1.568469  |
| 25 | 5  | 0 | -2.903424 | -3.717088 | 0.840187  |
| 26 | 1  | 0 | -2.238387 | -3.888483 | -1.672744 |
| 27 | 5  | 0 | -1.276621 | -3.034564 | 0.607625  |
| 28 | 5  | 0 | -1.257090 | -1.360958 | 1.184688  |
| 29 | 1  | 0 | -4.817433 | -2.521725 | 2.315945  |
| 30 | 5  | 0 | -2.219219 | -2.610569 | 2.042686  |
| 31 | 1  | 0 | -3.101963 | -4.858207 | 1.088206  |
| 32 | 1  | 0 | -0.306579 | -3.711103 | 0.687811  |
| 33 | 1  | 0 | -0.364191 | -0.923937 | 1.815638  |
| 34 | 1  | 0 | -1.966099 | -2.852839 | 3.171549  |
| 35 | 27 | 0 | -2.305635 | 0.080299  | 0.080273  |
| 36 | 6  | 0 | -3.878388 | -1.190424 | 0.419157  |
| 37 | 6  | 0 | -2.859836 | -1.098612 | 1.661413  |
| 38 | 6  | 0 | -3.313728 | 1.584601  | -0.885242 |

|    |   |   |           |           |           |
|----|---|---|-----------|-----------|-----------|
| 39 | 6 | 0 | -3.143179 | 1.853583  | 0.689890  |
| 40 | 1 | 0 | -4.255447 | 1.180666  | -1.226325 |
| 41 | 1 | 0 | -3.986444 | 1.622975  | 1.326328  |
| 42 | 1 | 0 | -4.781742 | -0.598131 | 0.472834  |
| 43 | 1 | 0 | -3.126284 | -0.447040 | 2.480713  |
| 44 | 6 | 0 | 0.780582  | 0.572568  | -0.427558 |
| 45 | 6 | 0 | 2.148971  | 1.202709  | -0.138999 |
| 46 | 6 | 0 | -0.079966 | -1.549008 | -1.564637 |
| 47 | 6 | 0 | 3.092513  | 0.110095  | -0.490136 |
| 48 | 6 | 0 | 0.986874  | -0.631664 | -1.046169 |
| 49 | 6 | 0 | 2.424283  | -0.936292 | -1.098696 |
| 50 | 6 | 0 | 3.186193  | -2.048394 | -1.535278 |
| 51 | 6 | 0 | 4.414965  | 0.030717  | -0.078707 |
| 52 | 1 | 0 | -0.421048 | -1.195767 | -2.545579 |
| 53 | 1 | 0 | 0.352198  | -2.540207 | -1.737290 |
| 54 | 1 | 0 | 8.074109  | -0.214037 | 1.101196  |
| 55 | 1 | 0 | 2.225141  | 1.976851  | -0.928706 |
| 56 | 1 | 0 | 2.708863  | -2.875916 | -2.048503 |
| 57 | 6 | 0 | 4.546350  | -2.089563 | -1.277789 |
| 58 | 6 | 0 | 5.197006  | -1.080549 | -0.510461 |
| 59 | 6 | 0 | 4.890541  | 0.964786  | 0.893229  |
| 60 | 6 | 0 | 6.549933  | -1.122947 | -0.085136 |
| 61 | 1 | 0 | 5.131570  | -2.938209 | -1.618100 |
| 62 | 6 | 0 | 3.893525  | 1.847867  | 1.505025  |
| 63 | 6 | 0 | 6.209724  | 0.861344  | 1.295973  |
| 64 | 6 | 0 | 7.040524  | -0.161524 | 0.776027  |
| 65 | 1 | 0 | 7.189769  | -1.932944 | -0.420583 |
| 66 | 1 | 0 | 6.603487  | 1.540732  | 2.045332  |
| 67 | 6 | 0 | 2.602566  | 1.904379  | 1.114768  |
| 68 | 1 | 0 | 4.217767  | 2.438736  | 2.357121  |
| 69 | 1 | 0 | 1.901527  | 2.541379  | 1.637759  |

Perylene

|    |   |   |           |           |           |
|----|---|---|-----------|-----------|-----------|
| 1  | 5 | 0 | -4.837587 | -2.607591 | -0.000274 |
| 2  | 1 | 0 | -5.998256 | -2.821269 | -0.000426 |
| 3  | 5 | 0 | -3.446634 | -3.685384 | -0.000123 |
| 4  | 1 | 0 | -3.604733 | -4.859079 | -0.000177 |
| 5  | 5 | 0 | -3.809426 | -2.695467 | 1.420590  |
| 6  | 1 | 0 | -4.278805 | -3.055958 | 2.443853  |
| 7  | 5 | 0 | -2.692914 | -1.296227 | 1.434605  |
| 8  | 1 | 0 | -2.464795 | -0.919861 | 2.524332  |
| 9  | 5 | 0 | -3.809062 | -2.695383 | -1.420873 |
| 10 | 1 | 0 | -4.278170 | -3.055813 | -2.444282 |
| 11 | 5 | 0 | -2.692535 | -1.296146 | -1.434515 |
| 12 | 1 | 0 | -2.464097 | -0.919748 | -2.524160 |
| 13 | 5 | 0 | -2.132574 | -2.878698 | -0.888109 |
| 14 | 1 | 0 | -1.376888 | -3.503817 | -1.550729 |
| 15 | 5 | 0 | -2.132803 | -2.878741 | 0.888259  |
| 16 | 1 | 0 | -1.377319 | -3.503918 | 1.551057  |
| 17 | 5 | 0 | -1.588278 | -1.400265 | 0.000175  |
| 18 | 1 | 0 | -2.240160 | 1.192352  | 2.531079  |
| 19 | 5 | 0 | -2.365882 | 1.616005  | 1.441916  |
| 20 | 5 | 0 | -3.085983 | 3.251430  | 1.421528  |
| 21 | 5 | 0 | -1.416834 | 2.999223  | 0.885907  |
| 22 | 5 | 0 | -1.304097 | 1.434789  | -0.000017 |
| 23 | 1 | 0 | -3.454163 | 3.718438  | 2.443230  |
| 24 | 5 | 0 | -4.103181 | 3.416628  | 0.000246  |
| 25 | 5 | 0 | -2.483468 | 4.114383  | 0.000150  |
| 26 | 1 | 0 | -0.503641 | 3.395469  | 1.529583  |
| 27 | 5 | 0 | -1.416961 | 2.999272  | -0.885838 |



|    |    |   |           |           |           |
|----|----|---|-----------|-----------|-----------|
| 28 | 5  | 0 | -2.366095 | 1.616092  | -1.441792 |
| 29 | 1  | 0 | -5.174122 | 3.912744  | 0.000339  |
| 30 | 5  | 0 | -3.086190 | 3.251514  | -1.421193 |
| 31 | 1  | 0 | -2.344645 | 5.290510  | 0.000173  |
| 32 | 1  | 0 | -0.503867 | 3.395569  | -1.529625 |
| 33 | 1  | 0 | -2.240565 | 1.192527  | -2.531012 |
| 34 | 1  | 0 | -3.454522 | 3.718583  | -2.442812 |
| 35 | 27 | 0 | -3.003316 | 0.216420  | 0.000064  |
| 36 | 6  | 0 | -3.905081 | 1.901527  | 0.800747  |
| 37 | 6  | 0 | -3.905202 | 1.901574  | -0.800370 |
| 38 | 6  | 0 | -4.266147 | -1.192251 | 0.800705  |
| 39 | 6  | 0 | -4.265937 | -1.192200 | -0.801023 |
| 40 | 1  | 0 | -5.072935 | -0.677253 | 1.302447  |
| 41 | 1  | 0 | -5.072590 | -0.677167 | -1.302944 |
| 42 | 1  | 0 | -4.816898 | 1.605093  | 1.299655  |
| 43 | 1  | 0 | -4.817101 | 1.605181  | -1.299154 |
| 44 | 6  | 0 | 1.118938  | -1.592129 | 0.000268  |
| 45 | 6  | 0 | 2.404180  | -0.939715 | 0.000118  |
| 46 | 6  | 0 | -0.094549 | -0.824876 | 0.000185  |
| 47 | 6  | 0 | 3.605719  | -1.716658 | 0.000196  |
| 48 | 6  | 0 | 2.464242  | 0.484095  | -0.000107 |
| 49 | 6  | 0 | 0.010852  | 0.566033  | -0.000014 |
| 50 | 6  | 0 | 4.915013  | -1.038146 | 0.000038  |
| 51 | 6  | 0 | 3.509807  | -3.101129 | 0.000423  |
| 52 | 6  | 0 | 3.765575  | 1.168160  | -0.000278 |
| 53 | 6  | 0 | 1.270788  | 1.186394  | -0.000150 |
| 54 | 6  | 0 | 4.966247  | 0.391392  | -0.000200 |
| 55 | 6  | 0 | 1.101818  | -3.009576 | 0.000501  |
| 56 | 6  | 0 | 3.874249  | 2.554747  | -0.000517 |
| 57 | 1  | 0 | 1.284941  | 2.267799  | -0.000294 |
| 58 | 1  | 0 | 8.382046  | 0.794963  | -0.000410 |
| 59 | 1  | 0 | 8.266738  | -1.680430 | 0.000006  |
| 60 | 6  | 0 | 6.114723  | -1.741297 | 0.000105  |
| 61 | 6  | 0 | 7.357690  | -1.088586 | -0.000054 |
| 62 | 6  | 0 | 7.425461  | 0.283569  | -0.000284 |
| 63 | 6  | 0 | 6.237495  | 1.054207  | -0.000363 |
| 64 | 6  | 0 | 6.285913  | 2.469333  | -0.000602 |
| 65 | 1  | 0 | 6.109463  | -2.822228 | 0.000281  |
| 66 | 1  | 0 | 0.155664  | -3.520718 | 0.000628  |
| 67 | 6  | 0 | 2.264940  | -3.742116 | 0.000577  |
| 68 | 1  | 0 | 4.402177  | -3.712406 | 0.000486  |
| 69 | 1  | 0 | 2.220905  | -4.825763 | 0.000754  |
| 70 | 6  | 0 | 5.121094  | 3.198606  | -0.000676 |
| 71 | 1  | 0 | 7.252651  | 2.961229  | -0.000725 |
| 72 | 1  | 0 | 2.983114  | 3.166071  | -0.000586 |
| 73 | 1  | 0 | 5.155669  | 4.282641  | -0.000859 |

Perylene-extrusion

|    |   |   |          |           |           |
|----|---|---|----------|-----------|-----------|
| 1  | 5 | 0 | 4.604455 | -2.380128 | -1.144377 |
| 2  | 1 | 0 | 5.757727 | -2.548615 | -1.330125 |
| 3  | 5 | 0 | 3.212873 | -3.433265 | -1.393323 |
| 4  | 1 | 0 | 3.361418 | -4.528055 | -1.819957 |
| 5  | 5 | 0 | 3.438487 | -1.999878 | -2.406110 |
| 6  | 1 | 0 | 3.804337 | -1.971122 | -3.529672 |
| 7  | 5 | 0 | 2.340475 | -0.714284 | -1.820096 |
| 8  | 1 | 0 | 1.999779 | 0.034510  | -2.663605 |
| 9  | 5 | 0 | 3.722508 | -2.999892 | 0.246423  |
| 10 | 1 | 0 | 4.298592 | -3.683024 | 1.020899  |
| 11 | 5 | 0 | 2.631395 | -1.719276 | 0.857897  |
| 12 | 1 | 0 | 2.516774 | -1.691780 | 2.034447  |

|    |    |   |           |           |           |
|----|----|---|-----------|-----------|-----------|
| 13 | 5  | 0 | 2.003820  | -3.027654 | -0.152149 |
| 14 | 1  | 0 | 1.303856  | -3.875035 | 0.285951  |
| 15 | 5  | 0 | 1.821819  | -2.405625 | -1.807283 |
| 16 | 1  | 0 | 0.973968  | -2.784551 | -2.544062 |
| 17 | 5  | 0 | 1.396813  | -1.343190 | -0.409379 |
| 18 | 1  | 0 | 3.299024  | 2.077785  | -1.971289 |
| 19 | 5  | 0 | 2.933029  | 2.109578  | -0.846751 |
| 20 | 5  | 0 | 3.658696  | 3.416909  | 0.135765  |
| 21 | 5  | 0 | 1.924355  | 3.397075  | -0.190208 |
| 22 | 5  | 0 | 1.308923  | 1.701148  | -0.173920 |
| 23 | 1  | 0 | 4.484791  | 4.112924  | -0.345811 |
| 24 | 5  | 0 | 3.920850  | 2.816570  | 1.770418  |
| 25 | 5  | 0 | 2.522323  | 3.834519  | 1.429893  |
| 26 | 1  | 0 | 1.420799  | 4.203257  | -0.900247 |
| 27 | 5  | 0 | 1.109637  | 2.765902  | 1.263824  |
| 28 | 5  | 0 | 1.615134  | 1.087249  | 1.497804  |
| 29 | 1  | 0 | 4.899944  | 3.010373  | 2.400542  |
| 30 | 5  | 0 | 2.356921  | 2.405670  | 2.463865  |
| 31 | 1  | 0 | 2.460878  | 4.931676  | 1.871828  |
| 32 | 1  | 0 | 0.026606  | 3.121752  | 1.587830  |
| 33 | 1  | 0 | 0.984838  | 0.322920  | 2.134306  |
| 34 | 1  | 0 | 2.246161  | 2.385314  | 3.640401  |
| 35 | 27 | 0 | 2.791371  | 0.197989  | 0.009981  |
| 36 | 6  | 0 | 4.026633  | 1.786709  | 0.403057  |
| 37 | 6  | 0 | 3.289397  | 1.215560  | 1.715676  |
| 38 | 6  | 0 | 3.962924  | -0.794731 | -1.347433 |
| 39 | 6  | 0 | 4.126249  | -1.361530 | 0.149957  |
| 40 | 1  | 0 | 4.709831  | -0.101460 | -1.705102 |
| 41 | 1  | 0 | 4.981519  | -1.022723 | 0.718634  |
| 42 | 1  | 0 | 5.046078  | 1.469871  | 0.230105  |
| 43 | 1  | 0 | 3.847688  | 0.543777  | 2.351129  |
| 44 | 6  | 0 | -0.115872 | -1.012856 | -0.205373 |
| 45 | 6  | 0 | -1.176738 | -2.017385 | 0.213131  |
| 46 | 6  | 0 | -0.026722 | 1.395949  | -1.002187 |
| 47 | 6  | 0 | -2.445316 | -1.241439 | 0.120514  |
| 48 | 6  | 0 | -0.747874 | 0.142144  | -0.587123 |
| 49 | 6  | 0 | -2.207970 | -0.012688 | -0.431005 |
| 50 | 6  | 0 | -3.347691 | 0.844933  | -0.733703 |
| 51 | 6  | 0 | -3.663964 | -1.651352 | 0.725208  |
| 52 | 1  | 0 | 0.203150  | 1.361862  | -2.074688 |
| 53 | 1  | 0 | -0.685104 | 2.253355  | -0.860161 |
| 54 | 1  | 0 | -2.294622 | -3.914564 | 2.870874  |
| 55 | 1  | 0 | -1.166464 | -2.734692 | -0.635787 |
| 56 | 6  | 0 | -3.258732 | 2.017609  | -1.472496 |
| 57 | 6  | 0 | -4.651656 | 0.407365  | -0.288119 |
| 58 | 6  | 0 | -4.839977 | -0.822125 | 0.430250  |
| 59 | 6  | 0 | -3.589498 | -2.662668 | 1.656123  |
| 60 | 6  | 0 | -6.122588 | -1.194996 | 0.812448  |
| 61 | 6  | 0 | -5.795481 | 1.214616  | -0.580887 |
| 62 | 6  | 0 | -2.311761 | -3.221783 | 2.035163  |
| 63 | 1  | 0 | -4.466174 | -2.967424 | 2.215177  |
| 64 | 1  | 0 | -6.269801 | -2.136773 | 1.326852  |
| 65 | 6  | 0 | -7.235050 | -0.388136 | 0.534121  |
| 66 | 1  | 0 | -0.202878 | -3.292058 | 1.770919  |
| 67 | 6  | 0 | -1.145499 | -2.880189 | 1.437495  |
| 68 | 1  | 0 | -2.301001 | 2.330766  | -1.857436 |
| 69 | 6  | 0 | -4.392382 | 2.804062  | -1.751044 |
| 70 | 6  | 0 | -5.634023 | 2.423679  | -1.309485 |
| 71 | 6  | 0 | -7.077085 | 0.796900  | -0.147945 |
| 72 | 1  | 0 | -8.221537 | -0.708417 | 0.851299  |

|    |   |   |           |          |           |
|----|---|---|-----------|----------|-----------|
| 73 | 1 | 0 | -7.933105 | 1.424064 | -0.373425 |
| 74 | 1 | 0 | -6.509750 | 3.029633 | -1.515816 |
| 75 | 1 | 0 | -4.272874 | 3.717704 | -2.323031 |

**Figure S6.** Comparison of aromaticity of linear benzenoids linked and non-linked to  $[o\text{-COSAN}]^-$ .  $[o\text{-COSAN}]^-$  without (left) and with extrusion (right). NICS (in ppm) and MCI values (in italics and in au) for the benzenoid moiety are included in the center of the rings, whereas those for the fully relaxed benzenoids not linked to  $[o\text{-COSAN}]^-$  are depicted outside the rings.

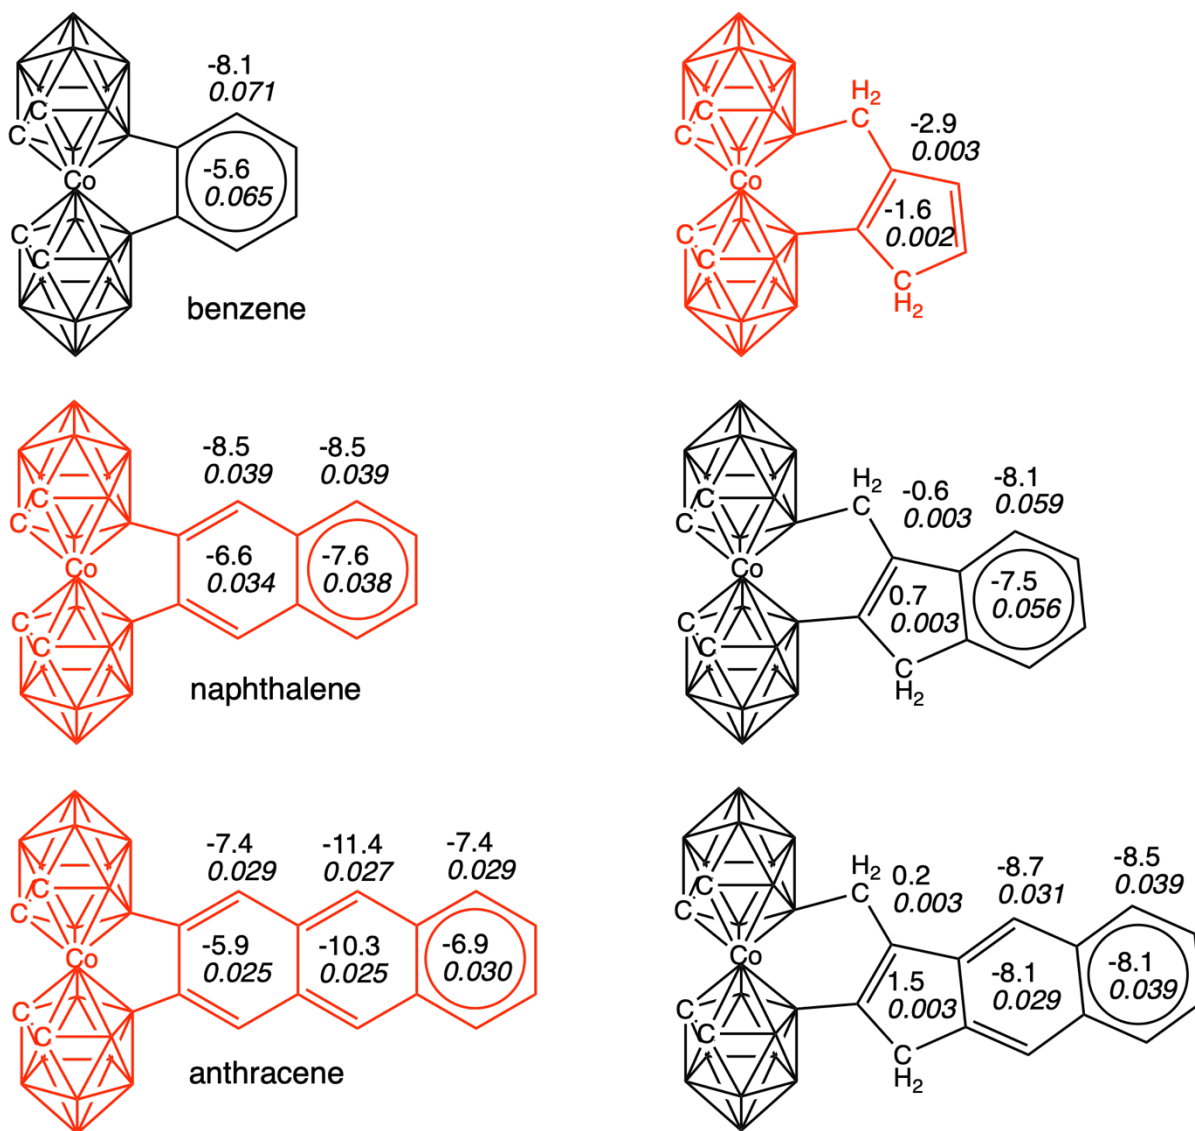

**Figure S7.** Comparison of aromaticity of kinked benzenoids linked and non-linked to  $[o\text{-COSAN}]^-$ .  $[o\text{-COSAN}]^-$  without (left) and with extrusion (right). NICS (in ppm) and MCI values (in italics and in au) for the benzenoid moiety are included in the center of the rings, whereas those for the fully relaxed benzenoids not linked to  $[o\text{-COSAN}]^-$  are depicted outside the rings.

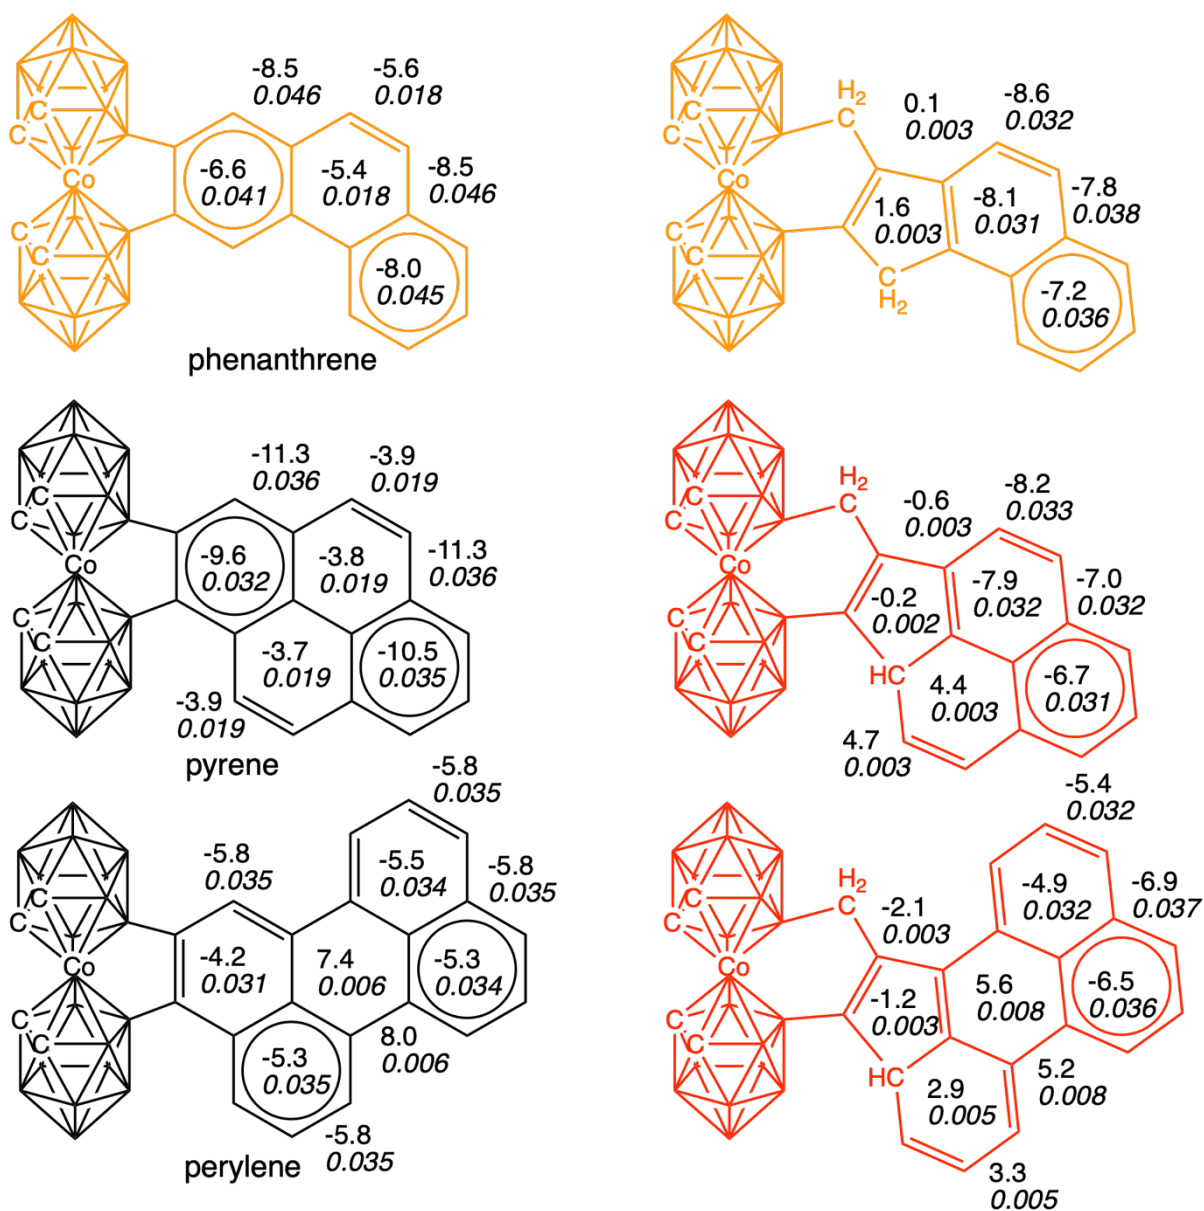

**Table S3:** Extrusion energies (in kcal mol<sup>-1</sup>) computed based on two different reactions: (1) [o-COSAN]<sup>-</sup>-benzenoid + H<sub>2</sub> → [o-COSAN]<sup>-</sup>-benzenoid<sup>extruded</sup>; and (2) [o-COSAN]<sup>-</sup> + benzenoid → [o-COSAN]<sup>-</sup>-benzenoid<sup>extruded</sup> + H<sub>2</sub>. Distances (in Å) between the two B atoms fused to the benzenoid are also included.<sup>[a,b]</sup>

|              | $\Delta E_{\text{ext}}^1$ | $\Delta G_{\text{ext}}^1$ | $\Delta E_{\text{ext}}^2$ | $\Delta G_{\text{ext}}^2$ |
|--------------|---------------------------|---------------------------|---------------------------|---------------------------|
| benzene      | 3.1                       | 16.3                      | 12.2                      | 14.8                      |
| naphthalene  | -7.1                      | 6.2                       | -0.5                      | 1.9                       |
| anthracene   | -11.1                     | 4.1                       | -6.0                      | -1.6                      |
| phenanthrene | -5.6                      | 7.5                       | 0.0                       | 3.7                       |
| pyrene       | 17.3                      | 31.4                      | 24.9                      | 29.3                      |
| perylene     | 22.5                      | 36.7                      | 29.5                      | 33.7                      |

<sup>[a]</sup> The equivalent distance between the two B atoms in [o-COSAN]<sup>-</sup> is 3.144 Å. <sup>[b]</sup> Extrusion energies calculated at the BLYP-D3BJ/TZ2P//B3LYP(GD3BJ)/6-311++G\*\* level of theory by means of AMS software.

**Figure S8.** Comparison of aromaticity of linear and kinked benzenoids linked and non-linked to  $[o\text{-COSAN}]^-$  without extrusion. NICS (in ppm) and MCI values (in italics and in au) for the benzenoid moiety are included in the center of the rings, whereas those for the fully relaxed benzenoids not linked to  $[o\text{-COSAN}]^-$  are depicted outside the rings, at the same B3LYP/6-311++G\*\* level of theory (in black) and at the CAM-B3LYP/6-311++G\*\* (in blue).

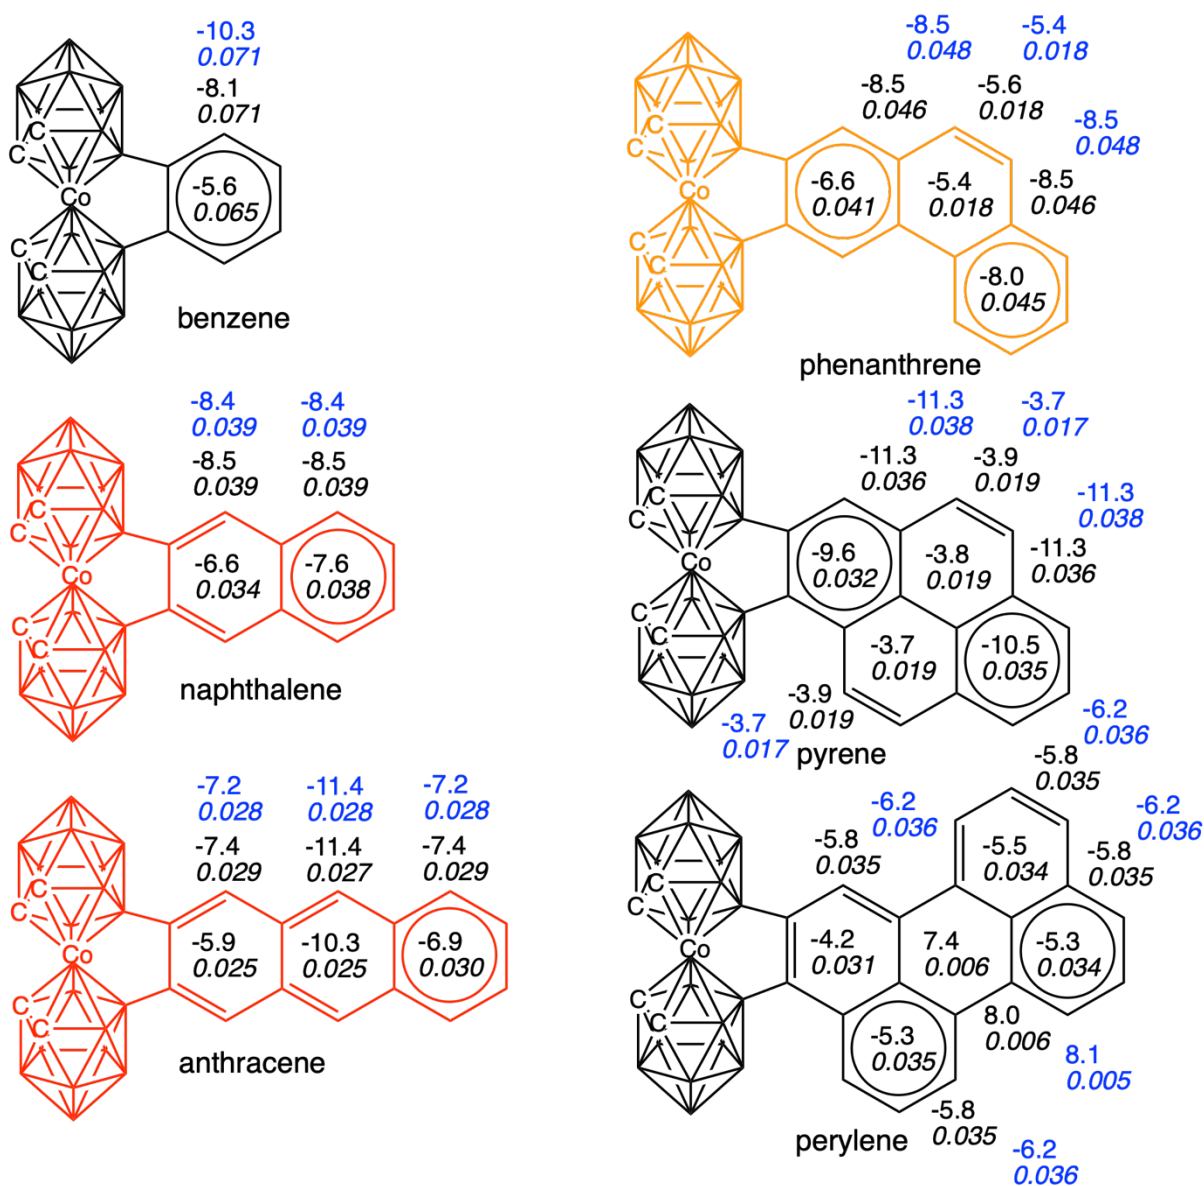

## References.

---

- [1] A. Franken, J. Plesek, C. Nachtigal, *Collect. Czechoslov. Chem. Commun.* **1997**, *62(5)*, 746-751.
- [2] M. J. Frisch, G. W. Trucks, H. B. Schlegel, G. E. Scuseria, M. A. Robb, J. R. Cheeseman, G. Scalmani, V. Barone, B. Mennucci, G. A. Petersson, H. Nakatsuji, M. Caricato, X. Li, H. P. Hratchian, A. F. Izmaylov, J. Bloino, G. Zheng, J. L. Sonnenberg, M. Hada, M. Ehara, K. Toyota, R. Fukuda, J. Hasegawa, M. Ishida, T. Nakajima, Y. Honda, O. Kitao, H. Nakai, T. Vreven, J. A. M. Jr., J. E. Peralta, F. Ogliaro, M. Bearpark, J. J. Heyd, E. Brothers, K. N. Kudin, V. N. Staroverov, R. Kobayashi, J. Normand, K. Raghavachari, A. Rendell, J. C. Burant, S. S. Iyengar, J. Tomasi, M. Cossi, N. Rega, J. M. Millam, M. Klene, J. E. Knox, J. B. Cross, V. Bakken, C. Adamo, J. Jaramillo, R. Gomperts, R. E. Stratmann, O. Yazyev, A. J. Austin, R. Cammi, C. Pomelli, J. W. Ochterski, R. L. Martin, K. Morokuma, V. G. Zakrzewski, G. A. Voth, P. Salvador, J. J. Dannenberg, S. Dapprich, A. D. Daniels, Ö. Farkas, J. B. Foresman, J. V. Ortiz, J. Cioslowski, D. J. Fox, *Vol. Revision A.02 ed.*, Gaussian, Inc., Pittsburgh, PA, **2009**.
- [3] A. D. Becke, *J. Chem. Phys.* **1993**, *98*, 5648-5652.
- [4] C. T. Lee, W. T. Yang, R. G. Parr, *Phys. Rev. B* **1988**, *37*, 785-789.
- [5] P. J. Stephens, F. J. Devlin, C. F. Chabalowski, M. J. Frisch, *J. Phys. Chem.* **1994**, *98*, 11623-11627.
- [6] M. J. Frisch, J. A. Pople, J. S. Binkley, *J. Chem. Phys.* **1984**, *80*, 3265-3269.
- [7] Z. F. Chen, C. S. Wannere, C. Corminboeuf, R. Puchta, P. V. Schleyer, *Chem. Rev.* **2005**, *105*, 3842-3888.
- [8] J. Poater, M. Solà, C. Viñas, F. Teixidor, *Chem. Eur. J.* **2013**, *19*, 4169-4175.



- 
- [9] J. Poater, M. Solà, C. Viñas, F. Teixidor, *Angew. Chem. Int. Ed.* **2014**, *53*, 12191-12195.
- [10] J. Poater, M. Solà, C. Viñas, F. Teixidor, *Chem. Eur. J.* **2016**, *22*, 7437-7443.
- [11] K. Wolinski, J. F. Hinton, P. Pulay, *J. Am. Chem. Soc.* **1990**, *112*, 8251-8260.
- [12] P. Bultinck, R. Ponec, S. Van Damme, *J. Phys. Org. Chem.* **2005**, *18*, 706-718.
- [13] M. Giambiagi, M. S. de Giambiagi, C. D. dos Santos, A. P. de Figueiredo, *Phys. Chem. Chem. Phys.* **2000**, *2*, 3381-3392.
- [14] F. Feixas, E. Matito, J. Poater, M. Solà, *Chem. Soc. Rev.* **2015**, *44*, 6434-6451.
- [15] E. Matito, M. Duran, M. Solà, *J. Chem. Phys.* **2005**, *122*, 014109. Erratum íbid, **2006**, *125*, 059901.
- [16] E. Matito, F. Feixas, M. Solà, *J. Molec. Struct. Theochem* **2007**, *811*, 3-11.
- [17] E. Matito, J. Poater, M. Solà, P. v. R. Schleyer, in *Chemical Reactivity Theory* (Ed.: P. K. Chattaraj), Taylor and Francis/CRC Press, Boca Ratón, FL, USA, **2009**.
- [18] E. Matito, P. Salvador, M. Duran, M. Solà, *J. Phys. Chem. A* **2006**, *110*, 5108-5113.
- [19] SCM, Theoretical Chemistry, Vrije Universiteit, Amsterdam, The Netherlands, **2021**.
